1 **A novel cell culture system modeling the SARS-CoV-2 life cycle**

2 Xiaohui Ju<sup>1</sup>, Yunkai Zhu<sup>2</sup>, Yuyan Wang<sup>2</sup>, Jingrui Li<sup>3</sup>, Jiaying Zhang<sup>4</sup>, Mingli Gong<sup>1</sup>,  
3 Wenlin Ren<sup>1</sup>, Sai Li<sup>4,5</sup>, Jin Zhong<sup>6</sup>, Qiangfeng Cliff Zhang<sup>4,5</sup>, Rong Zhang<sup>2</sup>, Qiang  
4 Ding<sup>1,5\*</sup>

5

6 <sup>1</sup> School of Medicine, Tsinghua University, Beijing 100084, China

7 <sup>2</sup> Key Laboratory of Medical Molecular Virology (MOE/NHC/CAMS), School of Basic  
8 Medical Sciences, Shanghai Medical College, Biosafety Level 3 Laboratory, Fudan  
9 University, Shanghai 200032, China

10 <sup>3</sup> State Key Laboratory of Plant Physiology and Biochemistry, College of Biological  
11 Sciences, China Agricultural University, Beijing 100193, China

12 <sup>4</sup> School of Life Sciences, Tsinghua University, Beijing 100084, China

13 <sup>5</sup> Beijing Advanced Innovation Center for Structural Biology, Tsinghua University,  
14 Beijing 100084, China

15 <sup>6</sup> Unit of Viral Hepatitis, CAS Key Laboratory of Molecular Virology and Immunology,  
16 Institut Pasteur of Shanghai, Chinese Academy of Sciences, Shanghai, 200031, China

17

18 \*Correspondence to Qiang Ding, [qding@tsinghua.edu.cn](mailto:qding@tsinghua.edu.cn)

19

20

## 21 ABSTRACT

22 Severe acute respiratory syndrome coronavirus 2 (SARS-CoV-2) causes the global  
23 pandemic of COVID-19, and no effective antiviral agents and vaccines are available.  
24 SARS-CoV-2 is classified as a biosafety level-3 (BLS-3) agent, impeding the basic  
25 research into its biology and the development of effective antivirals. Here, we  
26 developed a biosafety level-2 (BSL-2) cell culture system for production of  
27 transcription and replication-competent SARS-CoV-2 virus-like-particles (trVLP). This  
28 trVLP expresses a reporter gene (GFP) replacing viral nucleocapsid gene (N), which is  
29 required for viral genome packaging and virion assembly (SARS-CoV-2-GFP/ $\Delta$ N  
30 trVLP). The complete viral life cycle can be achieved and exclusively confined in the  
31 cells ectopically expressing SARS-CoV or SARS-CoV-2 N proteins, but not MERS-  
32 CoV N. Genetic recombination of N supplied *in trans* into viral genome was not  
33 detected, as evidenced by sequence analysis after one-month serial passages in the N-  
34 expressing cells. Moreover, intein-mediated protein trans-splicing approach was  
35 utilized to split the viral N gene into two independent vectors, and the ligated viral N  
36 protein could function *in trans* to recapitulate entire viral life cycle, further securing the  
37 biosafety of this cell culture model. Based on this BSL-2 SARS-CoV-2 cell culture  
38 model, we developed a 96-well format high throughput screening for antivirals  
39 discovery. We identified salinomycin, tubeimoside I, monensin sodium, lycorine  
40 chloride and nigericin sodium as potent antivirals against SARS-CoV-2 infection.  
41 Collectively, we developed a convenient and efficient SARS-CoV-2 reverse genetics  
42 tool to dissect the virus life cycle under a BSL-2 condition. This powerful tool should  
43 accelerate our understanding of SARS-CoV-2 biology and its antiviral development.

44

45 **Key words:** SARS-CoV-2, COVID-19, Reverse genetics, intein, drug screening.

46

47

## 48 INTRODUCTION

49 The coronavirus disease 2019 (COVID-19) caused by severe acute respiratory  
50 syndrome coronavirus 2 (SARS-CoV-2) is an ongoing pandemic<sup>1</sup>. As of 1 December  
51 2020, more than 63.7 million cases of COVID-19 have been reported, resulting in more  
52 than 1.5 million deaths. Severe patients died of breathing difficulty to acute respiratory  
53 distress. Up to now, there is still no vaccine and antiviral agents available<sup>2</sup>.

54 SARS-CoV-2 belongs to the genus *Coronavirus*, the family *Coronaviridae*, and  
55 the order *Nidovirales*. Its genome is a single-stranded, positive-sense RNA with similar  
56 specific gene characteristics of known coronaviruses<sup>3</sup>. The viral genome encodes non-  
57 structural proteins, structural proteins and accessory proteins. The non-structural  
58 proteins carry all of the enzymatic activities important for viral replication. For example,  
59 the genome encodes an RNA-dependent RNA-polymerase complex (nsp7, nsp8 and  
60 nsp12), RNA capping machinery (nsp10, nsp13, nsp14 and 16) and additional enzymes  
61 such as proteases (the nsp3 PLpro and the nsp5 3CLpro) which cleave viral  
62 polyproteins<sup>4,5</sup>. Structural proteins include surface (S), envelope (E), membrane (M),  
63 and nucleocapsid (N) proteins<sup>6</sup>. The S, E and M proteins are embedded within the lipid  
64 envelope. The primary function of N protein is to package the ~30 kb single stranded,  
65 5'-capped positive-strand viral genome RNA into a ribonucleoprotein (RNP) complex.  
66 Ribonucleocapsid packaging is a fundamental part of viral self-assembly, and the RNP  
67 complex constitutes the essential template for replication by the RNA-dependent RNA  
68 polymerase complex<sup>7</sup>. In addition, the N protein has been shown to modulate the host  
69 antiviral response and may play regulatory roles in the viral life cycle<sup>3</sup>. The accessory  
70 proteins, encoded by ORF3a, ORF6, ORF7a, ORF7b, and ORF8 genes, are not directly  
71 involved in viral replication but interfere with the host innate immune response or are  
72 of unknown function<sup>3,8,9</sup>.

73 The development of reverse genetics systems of coronavirus has profoundly  
74 advanced the study of this large-sized RNA virus. The cDNA of the coronavirus RNA  
75 genome is constructed using bacterial artificial chromosomes (BACs), in vitro ligation  
76 of CoV cDNA fragments, or vaccinia viral vector<sup>10</sup>. Recently, a SARS-CoV-2 full-

77 length cDNA clone has been established using the *in vitro* ligation of cDNA  
78 fragments<sup>11,12</sup>. This system has been shown to be efficient for the recovery of infectious  
79 virus, and a reporter gene can be inserted into the viral genome to monitor virus  
80 replication, providing a good tool for high-throughput antiviral screening. However,  
81 experimentations involving live virus are restricted to BSL-3 laboratories, which  
82 hinders the study of SARS-CoV-2 and development of countermeasures. Therefore, it  
83 is urgent to develop an efficient non-BSL-3 experimental system for SARS-CoV-2.  
84 Herein, we developed an N-based genetic complementation system to produce  
85 biologically contained, and transcription, replication-competent SARS-CoV-2 virus-  
86 like particles lacking N gene (SARS-CoV-2  $\Delta$ N trVLP). The lack of the viral N protein  
87 could be genetically complemented *in trans* by ectopic expression in packaging cells to  
88 produce the SARS-CoV-2  $\Delta$ N trVLP. SARS-CoV-2  $\Delta$ N trVLP could be propagated and  
89 passaged in the packaging cells while only results in single-round infection in wild-type  
90 cells. We applied this cell culture model for SARS-CoV-2 biology, antiviral evaluation  
91 and novel antivirals discovery.

92

## 93 **RESULTS**

### 94 **Design and assembly of SARS-CoV-2-GFP/ $\Delta$ N genome**

95 Nucleocapsid translated from a subgenomic RNA of SARS-CoV-2 has multiple  
96 functions and its primary function is participation in genomic RNA package and virus  
97 particle release. To test whether the function of N could be complemented *in trans*, we  
98 constructed SARS-CoV-2-GFP/ $\Delta$ N genome, in which we replaced the regions encoding  
99 viral N (from nucleotides position 28274 to 29533) based on MN908947 genome with  
100 GFP reporter gene, and Caco-2 cells, an immortalized cell line of human colorectal  
101 adenocarcinoma cells, as packaging cell lines which stably express viral N protein by  
102 lentiviral transduction (**Fig. 1**).

103 To assemble the molecular clone of SARS-CoV-2-GFP/ $\Delta$ N genome, we utilized  
104 an *in vitro* ligation approach, which has been used for constructing the infectious clone  
105 of SARS-CoV-2<sup>11,12</sup>. We divided the full-length cDNA of SARS-CoV-2-GFP/ $\Delta$ N  
106 genome into a set of five fragments (A, B, C, D and E) and each fragment can be  
107 obtained by PCR using the chemically synthesized viral genome (MN908947 strain) as  
108 the template. Each DNA fragment was flanked by a type IIS restriction endonuclease  
109 site (BsaI or BsmBI) that ensures unidirectional assembly of intermediates into a full-  
110 length cDNA. In addition, we engineered a T7 promoter upstream of fragment A and a  
111 poly(A) tails at the downstream of fragment E, allowing for *in vitro* transcription of  
112 capped, polyadenylated transcript of viral genome (**Fig. 1A**).

113 The five PCR-amplified DNA fragments were digested with BsaI or BsmBI to  
114 generate specific sticky ends (**Fig. 1B**). The digested fragments were further purified  
115 and were ligated by T4 DNA ligase at 4°C to generate the full-length cDNA of SARS-  
116 CoV-2-GFP/ $\Delta$ N genome. The resulting 29.4-Kbp *in vitro* ligation products were  
117 confirmed by agarose gel electrophoresis (**Fig. 1C**). Next, this *in vitro* ligation products  
118 were used as the template for *in vitro* transcription with the T7 RNA polymerase to  
119 generate the RNA transcript of SARS-CoV-2-GFP/ $\Delta$ N genome (**Fig. 1D**).

### 120 **Recovery and propagation of SARS-CoV-2-GFP/ $\Delta$ N trVLP**

121 Caco-2 cells are highly permissive for SARS-CoV-2 infection. As the recombinant

122 SARS-CoV-2-GFP/ $\Delta$ N virus like particles, lacking N gene, could potentially propagate  
123 in the cells supplied with viral N protein *in trans*, we established the Caco-2 cells stably  
124 expressing viral N gene by lentiviral transduction (designated as Caco-2-N cells). The  
125 expression of N was confirmed by flow cytometry and immunoblotting assay (**Fig. S1A,**  
126 **B and Fig. 1E**).

127 Next, we sought to recover SARS-CoV-2-GFP/ $\Delta$ N trVLP, the *in vitro* transcribed  
128 RNA transcript of viral genome was electroporated into Caco-2-N cells. Within 48h,  
129 GFP fluorescence can be readily observed, suggesting that viral genome replication and  
130 transcription occurs in the cell. After 96h, cytopathic effects (CPEs) were observed in  
131 the electroporated Caco-2-N cells, suggesting that the recombinant SARS-CoV-2-  
132 GFP/ $\Delta$ N trVLP was produced and propagated (**Fig. S2**). We collected the cell culture  
133 supernatants (denoted as passage 0 (P0) virus), and inoculated them to Caco-2 or Caco-  
134 2-N cells (**Fig. 2A**). GFP signal can be readily observed within 48 h, and further  
135 expanded within 72 h in Caco-2-N cells, whereas no signal was detected in Caco-2 cells  
136 (**Fig. 2B**). Cells were collected for immunoblotting and RT-qPCR analysis at 72 h post-  
137 infection to detect viral spike antigen and RNA abundance. Consistent with the GFP  
138 expression, we could detect viral spike expression and high abundance of viral RNA in  
139 the Caco-2-N cells but not in Caco-2 cells (**Fig. 2C and D**). RT-PCR analysis using a  
140 primer set outside the N-encoding region confirmed that the N gene was indeed  
141 replaced by GFP in the recombinant trVLP viral genome (**Fig. 2E**).

142 To characterize the SARS-CoV-2-GFP/ $\Delta$ N trVLP infection, two spike-specific  
143 mAbs (1F11 and 2F6)<sup>13</sup> were tested for their ability to neutralize infection of Caco-2-  
144 N cells. A neutralizing mAb specific for HIV gp120 (VRC-01) was also included as the  
145 control<sup>14</sup>. The mAbs were incubated with SARS-CoV-2-GFP/ $\Delta$ N trVLP for 1 h at 37°C,  
146 and the trVLP–mAb mixtures were tested for infection of Caco-2-N cells, respectively.  
147 Viral infection was determined by flow cytometry at 48 h post-infection, and the results  
148 showed that 1F11 and 2F6 inhibited trVLP infection in a dose-dependent manner; in  
149 contrast, VRC01 had no effect on the trVLP infection (**Fig. 2F**).

150 Soluble recombinant forms of the human ACE2 are able to bind SARS-CoV-2

151 spike protein and inhibit its interaction with cellular ACE2<sup>15,16</sup>. We therefore tested the  
152 ability of mouse IgG Fc fusion proteins of soluble human ACE2 (D30E) (hACE2  
153 (D30E)-Fc)<sup>16</sup> to inhibit SARS-CoV-2-GFP/ $\Delta$ N trVLP infection. F10scFv, an antibody  
154 specifically targeting HA of the Influenza A virus, was used as a negative control. The  
155 hACE2 (D30E)-Fc trVLP showed a dose-dependent neutralization of infectivity,  
156 inhibiting SARS-CoV-2-GFP/ $\Delta$ N infection of Caco-2-N cells by 70% at 0.5 $\mu$ g/ml (**Fig**  
157 **2G**). Together, these data demonstrated that the infection of SARS-CoV-2-GFP/ $\Delta$ N  
158 trVLP recapitulates that of wild-type virus as its virus entry is also mediated by the  
159 interaction between viral spike and host ACE2.

### 160 **Characterization of the genetic stability of SARS-CoV-2-GFP/ $\Delta$ N trVLP**

161 Next, we sought to characterize the genetic stability of SARS-CoV-2-GFP/ $\Delta$ N  
162 trVLP. For this purpose, we analyzed the rescued SARS-CoV-2-GFP/ $\Delta$ N trVLP in  
163 Caco-2-N cells after 10 passage. The cell culture supernatants collected from SARS-  
164 CoV-2-GFP/ $\Delta$ N RNA electroporated Caco-2-N cells were defined as P0, and the cell  
165 cultures collected from each subsequent passage on the Caco-2-N cells were defined as  
166 P1 to P10, respectively. The total RNAs extracted from each cell passage were used to  
167 perform RT-PCRs with the pair of primers to amplify the fragment between ORF8 and  
168 3'UTR that covers the region of the inserted GFP reporter gene. (**Fig.3A**). RT-PCR  
169 products of 1.5-Kbp and 1-Kbp were expected for WT genome and SARS-CoV-2-  
170 GFP/ $\Delta$ N genome, respectively. SARS-CoV-2-GFP/ $\Delta$ N trVLP was considerably stable  
171 for at least 3 serial passages since the 1-Kb RT-PCR products were detected at P3 trVLP  
172 (**Fig. 3B**). The loss of GFP reporter gene was detected in the P4 trVLP as indicated by  
173 amplicon of < 1 Kb size (**Fig. 3B, Fig S3A**). No PCR product of greater than 1 Kb was  
174 detected in the all samples, suggesting that no heterologous RNA inserted into the  
175 SARS-CoV-2-GFP/ $\Delta$ N genome, at least in the GFP report region.

176 To characterize the trVLP sequence variations in an unbiased manner, we  
177 performed deep sequencing analysis on the P1 and P10 trVLP genome. The deep  
178 sequencing analysis provides deep coverage, on the order of 30 million reads per  
179 sequencing sample (**Fig. S3B**). Sequences of P1 or P10 were mapped to the SARS-

180 CoV-2 and SARS-CoV-2-GFP/ $\Delta$ N trVLP genomes, respectively (**Fig. 3C and D**) and  
181 relative abundances of these sequences between P1 and P10, were also compared (**Fig**  
182 **3E, Fig S3C**). The deep sequencing analysis could not detect N sequences in the both  
183 P0 and P10 genome (**Fig. 3C**), and GFP sequences were readily detected in the P1  
184 genome with high abundance, however, it was rarely detected in the P10 genome (**Fig.**  
185 **3D**), due to GFP sequences deletion (**Fig. 3B, Fig S3A**). Additionally, we found that  
186 the subgenomic RNAs of ORF6, ORF7 and ORF8 were dramatically decreased in the  
187 P10-trVLP infected cells compared with that of P1 VLP (**Fig. 3E**), indicating that ORF6,  
188 ORF7 and ORF8 may not be required for virus infection at least *in vitro*, consistent with  
189 other reports that deletions of these regions were observed in clinical samples by deep  
190 sequencing analysis<sup>17-20</sup>.

### 191 **Reconstitution of functional N protein by split intein-mediated protein ligation**

192 Inteins are intervening protein sequences within a host protein that mediate their  
193 self-excision from the precursor protein and ligates the flanking N- and C-terminal  
194 fragments (exteins)<sup>21</sup>. Split inteins are a subset of inteins that are expressed as two  
195 separate polypeptides at the ends of two host proteins and catalyze their trans-splicing,  
196 resulting in the generation of a single larger polypeptide (**Fig. 4A**). To further minimize  
197 the chance of recombination of N into the SARS-CoV-2-GFP/ $\Delta$ N genome, we aimed  
198 to split the N gene into two separate elements using a naturally split intein embedded  
199 within the catalytic subunit of DNA polymerase III (DnaE) in many species of  
200 cyanobacteria (Npu intein)<sup>22</sup>. Npu intein activity is context-dependent, and Cys as first  
201 residue in the C-extein is required for efficient trans-splicing. However, there is no Cys  
202 residue in SARS-CoV-2 N protein. In order to split the N, we had to find the appropriate  
203 splice sites that would have two well-folded, yet stable protein fragments, and also  
204 substitute first residue in the C-extein with Cys without disruption of N protein function.  
205 To locate the splice sites according to these requirements we chose three splice sites in  
206 the N protein, to have the N-intein A152C, S176C and G212C (**Fig. 4A**). As for each  
207 of N-intein above, we constructed two lentivirus vectors encoding either the N- or the  
208 C-terminal half of the N protein fused to the N- and C-terminal halves of the Npu intein,



209 having N<sup>N</sup>-Int<sup>N</sup> and Int<sup>C</sup>-N<sup>C</sup>, respectively (**Fig. 4A**). Each lentivirus vector included  
210 appropriate regulatory elements (promoter and a polyadenylation signal) and a Flag tag  
211 to allow detection of the full-length reconstituted N protein (**Fig. 4A**). We then  
212 transduced N<sup>N</sup>-Int<sup>N</sup> and Int<sup>C</sup>-N<sup>C</sup> either individually or together in Caco-2 cells, and the  
213 full-length N protein reconstitution was assessed by Western blotting assay. We could  
214 not detect splicing above negligible levels of N protein by N-intein (A152C) (**lane 2,**  
215 **Fig. 4B**), while N-intein (S176C) and N-intein (G212C) could reconstitute into full-  
216 length N protein with S176C or G212C point mutation, respectively (**lane 5 and 8, Fig.**  
217 **4B**). Next, recombinant SARS-CoV-2 GFP/ $\Delta$ N trVLP (P1) was inoculated to Caco-2  
218 cells transduced with N-intein as indicated, and GFP fluorescence was detected after  
219 two days only in the cells transduced either with a single lentivirus that encodes full-  
220 length N or with the combination of N-intein (G212C), but not in the cells with the  
221 single N- and C-terminal N-intein (G212C). As expected, GFP fluorescence was also  
222 not detected in cells transduced with N-intein (A152C), of which the splicing did not  
223 occur; interestingly, N-intein (S176C) could ligate a full-length N (S176C), but fails to  
224 support virus infection, suggesting that the S176C mutation probably impairs N protein  
225 function (**Fig. 4C and D**). Consistent with the GFP expression, the subgenomic RNA  
226 of E can be readily detected in cells transduced either with a single lentivirus that  
227 encodes full-length N or with the combination of N-intein (G212C), but not others (**Fig.**  
228 **4E**). Together, we showed that the N-intein (G212C) was capable of efficiently trans-  
229 splicing to generate a functional N (G212C) protein to support SARS-CoV-2 GFP/ $\Delta$ N  
230 trVLP infection. As the N-intein was split into separate constructs, it would further  
231 reduce the potential biosafety concerns of this SARS-CoV-2 GFP/ $\Delta$ N trVLP cell culture  
232 model.

### 233 **Residue-specific phosphorylation of N protein is critical for viral infectivity**

234 Coronavirus N protein is an extensively phosphorylated, highly basic, vital  
235 structural protein the primary function of which is to form a helical ribonucleoprotein  
236 complex with viral RNA (RNP) as core structure of the virion. A variety of other  
237 functions have been ascribed, such as viral genome transcription and replication, or

238 evasion of antiviral immunity. SARS-CoV-2 N protein is highly homologous to the N  
239 protein of SARS-CoV, with 91% identity, while exhibited 48% identity with that of  
240 MERS-CoV (**Fig. 5A**). Several proteomics profiling analyses have been performed and  
241 reveals that N protein of SARS-CoV-2 is extensively phosphorylated at multiple sites  
242 (**Fig. 5A and Fig. S4**). However, the roles of N protein phosphorylation remain unclear.  
243 Our N-based genetic trans-complemented cell culture model offers an opportunity to  
244 specifically study N protein function in viral life cycle. Firstly, we determined whether  
245 SARS-CoV-2 GFP/ $\Delta$ N trVLP infection can be complemented by N proteins from  
246 different coronaviruses. We used SARS-CoV-2 GFP/ $\Delta$ N trVLP to infect the Caco-2 cells  
247 transduced with N from SARS-CoV-2, SARS-CoV or MERS-CoV. Two days later, the  
248 cell culture supernatants from each cells were collected to infect naive Caco-2 cells  
249 transduced with SARS-CoV-2 (Caco-2-N cells as previously used) to test whether  
250 SARS-CoV-2 GFP/ $\Delta$ N trVLP were assembled in the Caco-2 cells transduced with  
251 distinct N proteins. Two days later, the Caco-2-N cells were collected and GFP or viral  
252 RNA was quantified by flow cytometry or RT-qPCR, respectively (**Fig. 5B and C**).  
253 SARS-CoV N protein with 91% identity with that of SARS-CoV-2, but not MERS-  
254 CoV N protein with 48% identity with that of SARS-CoV-2, could rescue SARS-CoV-  
255 2 GFP/ $\Delta$ N trVLP, (**Fig. 5D and E**), suggesting that coronavirus N protein has virus-  
256 specific mechanism to recognize viral genome to achieve its function, meanwhile, N  
257 proteins from SARS-CoV and SARS-CoV-2, with high genetic similarity, have  
258 redundant function to some degree.

259 As SARS-CoV-2 N is heavily phosphorylated at multiple sites especially within  
260 the central Ser-Arg (SR)-rich motif, we are interested in the roles of phosphorylation in  
261 N function. For this purpose, we mutated S176, S413, S176/413, S105, S183, S188,  
262 S206, S188/206 as the conservation of these residues with that of SARS-CoV into  
263 alanine to specifically dissect their function. Notably, GSK-3 is the kinase responsible  
264 for the phosphorylation of this SR-rich motif in SARS-CoV N protein, which are  
265 primed by the phosphorylation of Ser-189 and Ser-207 (Ser-188 and Ser-206 in SARS-  
266 CoV-2 N protein accordingly)<sup>23,24</sup>. We generated the Caco-2 cells lentivirally

267 transduced with the N variants as indicated. As shown in Western blotting assay, the  
268 mutations did not alter the protein expression and stability in the Caco-2 cell (**Fig. 5F**),  
269 We noted that N with the S188A/S206A double mutations migrated slightly faster than  
270 WT and other mutants, probably because blockade of the initial priming  
271 phosphorylation would prohibit subsequent phosphorylation events by GSK-3, which  
272 was observed in SARS-CoV<sup>23</sup>. Next, we inoculated the Caco-2 cells expressing  
273 different N variants with SARS-CoV-2 GFP/ $\Delta$ N trVLP, and cell culture supernatant was  
274 collected 48 h later to infect the naïve Caco-2-N cells, and cells were collected to  
275 observe or determine GFP expressing by microscopy or flow cytometry 2 days later.  
276 Interestingly, most of the phosphorylation null mutants were able to assemble virus-like  
277 particles with comparable or slightly reduced efficiencies than WT. However,  
278 S188A/S206A double mutations completely abolish N function (**Fig. 5G-H**),  
279 highlighting the critical role of S188 and S206 for N function.

280 To further investigate whether GSK-3 contributing N protein phosphorylation to  
281 regulate virus life cycle, we treated Caco-2-N cells with LiCl or SB216763, which are  
282 specific inhibitors of GSK-3 and inoculated cells with SARS-CoV-2 trVLP  
283 spontaneously. Two days later, cell culture medium was collected and infect Caco-2-N  
284 cells for additional 2 days, and then cells were harvested for flow cytometry analysis of  
285 GFP expression. As expected, the LiCl or SB216763 could inhibit GFP expression in a  
286 dose-dependent manner, indicating that inhibition of GSK-3 could block N  
287 phosphorylation, thus impairing SARS-CoV-2 trVLP production. Given the vital role  
288 of the N protein in multiple stages of the viral life cycle, inhibition of N functions by  
289 modulating host cell kinases may be viable strategies for combating SARS-CoV-2  
290 infections.

### 291 **Evaluation of the antivirals using SARS-CoV-2-GFP/ $\Delta$ N VLP cell culture model**

292 To test the utility of this system in anti-viral drug screening, we evaluated the  
293 efficacy of IFN- $\beta$ , remdesivir, GC376, lopinavir, and ritonavir in inhibiting SARS-  
294 CoV-2 GFP/ $\Delta$ N trVLP infection. Caco-2-N-intein (G212C) cells were treated with IFN-  
295  $\beta$  with 0.2–20 pg/ml for eight hours prior to infection. Then cells were infected with

296 SARS-CoV-2 GFP/ $\Delta$ N trVLP at a multiplicity of infection (MOI) of 0.05. After 48 h,  
297 the cells were collected and GFP fluorescence, the proxy of virus infection, was  
298 quantified by flow cytometry analysis. Remarkably, even at 0.2 pg/ml IFN- $\beta$  we  
299 observed 60% reduction of the GFP fluorescence (**Fig. 6A**). This is consistent with  
300 recent reports that SARS-CoV-2 is sensitive to type I interferon treatment<sup>11,25-27</sup>.  
301 Remdesivir and GC376, which targets virus RNA dependent RNA polymerase (RdRp)  
302 and 3CLpro respectively, have been reported to be potent antivirals against SARS-CoV-  
303 2<sup>28-32</sup>. Lopinavir and ritonavir-HIV protease inhibitor, is a combination antiviral  
304 medicine used to treat HIV<sup>33</sup>, which could inhibit SARS-CoV and MERS-CoV  
305 infection *in vitro*, and they may target SARS-CoV-2 Nsp5 (3CLpro) to inhibit virus  
306 infection. To test potential dose-dependent antiviral activity of those drugs in our  
307 system, we incubated Caco-2-N-intein (G212C) cells with various concentrations of  
308 those drugs and simultaneously infected the cells with SARS-CoV-2 GFP/ $\Delta$ N trVLP at  
309 a MOI of 0.05. After 2 days, GFP fluorescence was determined (**Fig.6 B-E**). Remdesivir  
310 and GC376 exhibited potent antiviral effect with  $IC_{50}$ =62.5 nM and 4.5  $\mu$ M respectively,  
311 with essentially no apparent cytotoxic effect (**Fig.6 B and C**). In contrast, Lopinavir or  
312 ritonavir inhibited SARS-CoV-2 GFP/ $\Delta$ N trVLP with  $IC_{50}$ =8.7  $\mu$ M, or 7.7  $\mu$ M, while  
313 those drugs both show serious cytotoxicity at the  $IC_{50}$  concentration (**Fig.6 D and E**),  
314 compromising their clinical utilities, which is in line with the fact that lopinavir and  
315 ritonavir as no significant beneficial effect was observed in a randomized trial  
316 established in March 2020 with a total of 1,596 patients<sup>34</sup>.

317 These results demonstrated that our experimental system can be used for  
318 evaluation of antivirals and could be potentially developed for high-throughput  
319 screening of antiviral compounds.

### 320 **Identification of potent antivirals against SARS-CoV-2 virus using trVLP cell** 321 **culture model by high-throughput screening**

322 To provide proof-of-concept that our system could be utilized in high-throughput  
323 screening, we performed HTS of Topscience natural product library containing 377  
324 drugs (**Fig. 7A**) and the potential hit compounds were further assessed using authentic

325 SARS-CoV-2 to confirm the antiviral activities *in vitro*. DMSO or remdesivir were  
326 included as the negative or positive control.

327       Among the 377 compounds of the compound library, 10 hit molecules showed  
328 equal or higher inhibition with an inhibitory efficiency  $\geq 60\%$  (**Fig. 7A**). In addition,  
329 we excluded five hits due to the visible cytotoxicity. This criterion allowed the selection  
330 of five hits as the highest confident hits: salinomycin, tubeimoside I, monensin sodium,  
331 lycorine chloride and nigericin sodium (**Fig. 7A**). Among these five compounds,  
332 lycorine chloride, salinomycin and monensin sodium inhibit HCoV-OC43 infection as  
333 previously reported<sup>35</sup> and monensin sodium blocks avian infectious bronchitis virus  
334 (IBV) infection<sup>36</sup>. Notably, a recent study demonstrated that salinomycin possessed a  
335 potent antiviral activity to inhibit SARS-CoV-2 infection *in vitro*<sup>37</sup>, which further  
336 demonstrated that our system could be used for HTP antiviral screening. We next  
337 determined the IC<sub>50</sub> of the hit compounds using authentic SARS-CoV-2 virus.  
338 Salinomycin showed SARS-CoV-2 antiviral activity with an IC<sub>50</sub> and CC<sub>50</sub> of 2.836  
339 and 20.23  $\mu\text{M}$ , respectively, and selectivity index (SI = CC<sub>50</sub>/IC<sub>50</sub>) of 7.13. In  
340 comparison, other four compounds did not show dramatic cytotoxic effect in the tested  
341 concentrations. Of note, tubeimoside I exhibited an IC<sub>50</sub> of 1.371  $\mu\text{M}$ ; monensin sodium  
342 exhibited an IC<sub>50</sub> of 0.632  $\mu\text{M}$ ; lycorine chloride showed antiviral activity with an IC<sub>50</sub>  
343 of 0.773  $\mu\text{M}$ , and nigericin sodium, exhibited an IC<sub>50</sub> of 11.25  $\mu\text{M}$ . These results  
344 demonstrated that the compounds we identified using SARS-CoV-2 GFP/ $\Delta\text{N}$  trVLP  
345 system exhibited potent antiviral activity against authentic SARS-CoV-2 infection, and  
346 our screening provided new candidate compounds to effectively treat infection of  
347 SARS-CoV-2.

348

349

## 350 **DISCUSSION**

351 As its high pathogenicity and the lack of effective vaccines and therapeutics,  
352 SARS-CoV-2 is classified as a biological safety level 3 (BSL-3) pathogen<sup>38</sup>, which has  
353 hindered the drug discovery and biological research due to biocontainment  
354 requirements. In this study, we developed an *in vitro* cell culture system to produce the  
355 recombinant SARS-CoV-2 virus lacking the N-encoding region in the viral genome  
356 (SARS-CoV-2  $\Delta$ N). Recombinant SARS-CoV-2  $\Delta$ N can expand and propagate in  
357 packaging cells (Caco-2-N) but results in only single-cycle infection in naïve Vero or  
358 Caco-2 cells, which biologically contained the virus in the cells expressing N protein.  
359 This BSL-2 SARS-CoV-2 possesses a reporter gene GFP, providing a surrogate readout  
360 for authentic viral infection. We monitored the recombinant virus infection in the Caco-  
361 2-N cells for one month and NGS sequencing result suggested that no recombination  
362 was detected. In addition, we utilized the split intein-mediated protein ligation to  
363 reconstitute N function which further ensure the biosafety of this system.

364 This cell model represents a unique system in the basic research application for  
365 better understanding SARS-CoV-2 life cycle. Virus has evolved since its outbreak in  
366 the end of last year, and some mutations or deletions have been observed. However, the  
367 functional consequences of these mutations or deletions on virus infectivity or  
368 pathogenesis is poorly characterized. Herein, we utilized our model system to study the  
369 roles of N in the SARS-CoV-2 life cycle. Since N can be expressed alone *in trans*, it is  
370 convenient to perform mutagenesis on N to dissect its detailed function. Moreover, the  
371 introduction of mutations *in trans*-expressed N will avoid the cis effects of the  
372 mutations, for example, the disruption of critical RNA secondary or tertiary structures  
373 in the SARS-CoV-2 genome, thereby providing a more appropriate system to  
374 specifically evaluate the biological roles of domains, motifs, or amino acid residues  
375 within the N protein. Additionally, we inserted a Flag tag at the C terminus of N, which  
376 did not impair the ability of N to rescue viral production. With this Flag tag, N can be  
377 detected and immunoprecipitated by an anti-FLAG antibody (**Fig. S4A**). Multiple  
378 amino acids in N protein can be phosphorylated, but our data demonstrated that most

379 of these phosphorylation may not be required for N function at least *in vitro*. Meanwhile,  
380 we also identified numerous host factors associated with N protein (**Fig. S4A; Table**  
381 **S2**), notably, we also found that N protein could interact with G3BP1 and G3BP2, the  
382 stress granule assembly proteins, which was in line with previous studies<sup>39,40</sup>. Recent  
383 studies found that N protein could impair the stress granule assembly to escape the  
384 antiviral effect<sup>40,41</sup>. Thus, the trVLP system provides a new tool to study host factors  
385 and viral proteins that may interact with N during SARS-CoV-2 infection.

386 Development of effective therapeutics for COVID-19 remains an urgently unmet  
387 medical need. This recombinant trVLP recapitulates the complete SARS-CoV-2 life-  
388 cycle in the Caco-2-N or Caco-2-N<sup>intein</sup> cells. The reporter readout of the virus, such as  
389 fluorescent proteins or luminescent proteins, offers a rapid, real-time, quantitative and  
390 less labor-intensive measures than traditional methods of viral titer reduction.  
391 Importantly, the reporter virus-based assay could cooperate with a BSL-2 compatible  
392 high-content screening platform to facilitate antiviral screening. Thus, we developed a  
393 96-well format to screen the antiviral compounds in the Topscience Natural Compounds  
394 Library, and we identified five compounds which could efficiently block SARS-CoV-2  
395 infection. Among them, lycorine, salinomycin and monensin have been reported as the  
396 potent inhibitors against HCoV-OC43 infection<sup>35</sup>, and salinomycin could block SARS-  
397 CoV-2 infection as reported recently<sup>37</sup>. Those data further validate the suitability of our  
398 trVLP system in drug discovery. In our screening, we identified Tubeimoside I and  
399 nigericin sodium as novel compounds which exhibited potent antiviral activities against  
400 authentic SARS-CoV-2 infection *in vitro*. Future studies could be performed to evaluate  
401 their antiviral activities *in vivo*.

402 Additionally, there is an urgently need for effective vaccines to contain SARS-  
403 CoV-2 pandemic<sup>38</sup>. The recombinant SARS-CoV-2 lacking of N gene should provide a  
404 new means of vaccine development. The greatest advantage of SARS-CoV-2  $\Delta$ N is that  
405 this virus possesses all the structural viral proteins to induce humoral immune responses  
406 and that, upon infection, it could produce all the nonstructural viral proteins in host cells  
407 to induce cell-mediated immune responses. Of course, further studies, especially in

408 animals, are needed to determine the immunogenicity, safety, and efficacy of it.

409         In summary, the biologically contained SARS-CoV-2 trVLP lacking the N gene  
410 represents a safe, alternative experimental system to study SARS-CoV-2 biology and  
411 to screen antiviral compounds and this novel system will greatly accelerate current  
412 SARS-CoV-2 research efforts.  
413



414 **ACKNOWLEDGEMENTS**

415 We thank Di Qu, Xia Cai, Zhiping Sun, Wendong Han, and other colleagues at  
416 the Biosafety Level 3 Laboratory of Fudan University for help with experiment design  
417 and technical assistance. We thank Dr. Guocai Zhong (Shenzhen Bay Laboratory,  
418 Shenzhen, China) for generously providing the recombinant ACE2-Fc protein. We  
419 thank Prof. Haiteng Deng and Xianbin Meng in Proteinomics Facility at Technology  
420 Center for Protein Sciences, Tsinghua University, for protein MS analysis. We thank  
421 Dr. Jenna M. Gaska for suggestions and revision of the manuscript. We are grateful to  
422 other members of the Ding lab for critical discussions and comments on the  
423 manuscript.

424 This work was supported by Tsinghua-Peking University Center of Life Sciences  
425 (045-61020100120), Tsinghua University Initiative Scientific Research Program  
426 (2019Z06QCX10), National Natural Science Foundation of China (32041005),  
427 National Key Research and Development Program of China (2020YFA0707701),  
428 Beijing Advanced Innovation Center for Structure Biology (100300001), Start-up  
429 Foundation of Tsinghua University (53332101319), Project of Novel Coronavirus  
430 Research of Fudan University (to Y.X.), and Development Programs for COVID-19 of  
431 Shanghai Science and Technology Commission (20431900401).

432 **Potential Competing Interest statements**

433 Q.D. and X.J. have filed a patent application on the use of the SARS-CoV-2  
434 transcomplementation system and its use for anti-SARS-CoV-2 drug screening.

435  
436

437

## 438 **MATERIALS And METHODS**

439 **Cell culture.** HEK293T, Vero, Vero E6, A549 and Caco-2 cells were maintained in  
440 Dulbecco's modified Eagle medium (DMEM) (Gibco, China) supplemented with 10%  
441 (vol/vol) fetal bovine serum (FBS), and 50 IU/ml penicillin/streptomycin in a  
442 humidified 5% (vol/vol) CO<sub>2</sub> incubator at 37°C. All cell lines were tested negative for  
443 mycoplasma.

444 **Cloning of the SARS-CoV-2-GFP/ $\Delta$ N cDNA.** cDNAs (Wuhan-Hu-1, MN908947) of  
445 SARS-CoV-2-GFP/ $\Delta$ N were synthesized from the GenScript company. PCR was  
446 conducted to amplify fragments A, B, C, D and E using high fidelity PrimeSTAR Max  
447 DNA Polymerase (Takara). T7 promoter was introduced upstream of 5' UTR of SARS-  
448 CoV-2 genome in fragment A. To guarantee a seamless assembly of the full-length  
449 cDNA, type IIS restriction endonuclease sites (BsaI or BsmBI) were introduced at both  
450 ends of PCR fragments. The primers used for the PCR assay were listed in  
451 Supplemental Table 1.

452 **Assembly of a Full-Length SARS-CoV-2-GFP/ $\Delta$ N cDNA.** PCR fragments were  
453 digested with BsaI or BsmBI restriction enzyme (NEB) to specific sticky end. Digested  
454 fragments are purified by E.Z.N.A gel extraction kit (Omega). Fragment A, B are  
455 ligated first by T4 DNA ligase (NEB) in 40 $\mu$ l system. At the same time, fragments C,  
456 D, E are also ligated in another tube at 4°C for 24 hours. Then, fragment A, B and C,  
457 D, E are combined together added with 2 $\mu$ l T4 DNA ligase buffer and 2 $\mu$ l T4 DNA  
458 ligase to 100 $\mu$ l at 4°C for another 24 hours. At the end of ligation, we took 5 $\mu$ l product  
459 to run an agarose gel to check the efficiency of ligation. Full-length assembly cDNA  
460 was phenol/chloroform extracted, isopropanol precipitated, and resuspended in 10 $\mu$ L  
461 nuclease-free water.

462 **RNA *in vitro* transcription, electroporation and virus production.** RNA transcript  
463 was *in vitro* transcribed by the mMMESSAGE mMACHINE T7 Transcription Kit  
464 (ThermoFisher Scientific) in 30 $\mu$ l system with some modifications. Twenty  
465 micrograms of viral RNA and 20 $\mu$ g N mRNA were mixed and added to a 4-mm cuvette

466 containing 0.4 mL of Caco-2-N cells ( $8 \times 10^6$ ) in Opti-MEM. Single electrical pulse was  
467 given with a GenePulser apparatus (Bio-Rad) with setting of 270V at 950 $\mu$ F. GFP signal  
468 can be observed 17 hours post electroporation. Three days post electroporation, P0 virus  
469 was collected and Caco-2-N cells were infected with P0 virus to amplify virus.

470 **Lentivirus packaging.** Vesicular stomatitis virus G protein (VSV-G) pseudotyped  
471 lentiviruses were produced by transient cotransfection of the third-generation  
472 packaging plasmids pMD2G (catalog no. 12259; Addgene), psPAX2 (catalog number  
473 12260; Addgene) and the transfer vector pLVX by VigoFect DNA transfection reagent  
474 (Vigorous) into HEK293T cells. The medium was changed 12 h post transfection.  
475 Supernatants were collected at 36, 60 and 84 h after transfection, pooled, passed  
476 through a 0.45- $\mu$ m filter, aliquoted, and frozen at -80°C refrigerator.

477 **RNA isolation and RT-qPCR.** Total cellular RNA was isolated using TRNzol reagent  
478 (Thermo, 15596018). To analyze the RNA level of SARS-CoV-2 in infected cells,  
479 quantitative real-time PCR was performed. In brief, 1 $\mu$ g total RNA was reverse  
480 transcribed using ReverTra Ace qPCR RT Kit (TOYOBO, FSQ-101) to produce cDNA  
481 with random primers. Reactions of qPCR were carried out using the 2 $\times$ RealStar Green  
482 Power Mixture (Genstar, A311) according to the instruction. The qPCR primers for  
483 viral RNA were as follows: THU-2190 (5'- CGAAAGGTAAGATGGAGAGCC-3')  
484 and THU-2191 (5'- TGTTGACGTGCCTCTGATAAG-3'). The sequences of the qPCR  
485 primers for GAPDH was described previously<sup>42</sup>. Relative expression levels of the target  
486 genes were calculated using the comparative cycle threshold (CT) method. All data  
487 were normalized relative to the housekeeping gene GAPDH.

488 **RNA-seq and data analysis.** Total RNA was extracted by using TRIzol™ Reagent  
489 (Invitrogen) according to the manufacturer's protocol. The rRNAs were removed by  
490 using Ribo-Zero Gold module of Illumina TruSeq stranded total RNA library prep kit  
491 (RS-122-2201) and then cDNA libraries were constructed according to the  
492 manufacturer's protocol. RNA-seq was performed by using the Illumina Novaseq  
493 platform. The reference genome of SARS2 (MN908947) was downloaded from  
494 <https://www.ncbi.nlm.nih.gov/nuccore/MN908947>. After removing low-quality

495 reads, remaining Illumina sequence reads were mapped to human (GRCh38) and  
496 SARS2 genome by using HISAT2.1.0 with parameters: --rna-strandness RF -dta.  
497 RNA-seq coverage was visualized by using Integrative Genomics Viewer (IGV). To  
498 quantify the expression levels of SARS2 genes, RPKM of each virus genes and GFP  
499 gene were calculated. Heatmaps were drawn by using R package “pheatmap”  
500 (<https://www.r-project.org>). To quantify the junction-reads from subgenomic RNAs,  
501 the STAR2.7.5c was used for reads mapping. The junction-reads was defined and  
502 collected as described in Kim, Cell, 2020. A Sankey diagram was drawn by using R  
503 packages named “networkD3” and “dplyr”.

504 **IFN- $\beta$ , neutralizing antibody and drug treatment.** To assess the antiviral efficacies  
505 of the materials,  $1 \times 10^4$  Caco-2-N cells were seeded into 96-well plates. After 12h, cells  
506 were infected with SARS-CoV-2-GFP $\Delta$ N virus at MOI of 0.05. For neutralizing  
507 antibody treatment, virus was incubated with neutralizing antibody for 1 hour at 37°C  
508 before infection. For IFN- $\beta$  (Sino Biological, 10704-HNAS-5) test, cells were pre-  
509 treated with IFN- $\beta$  for 8 hours before infection. For remdesivir (MedChemExpress,  
510 HY-104077), lopinavir (biochempartner, BCP01395) or ritonavir (biochempartner,  
511 BCP03777) treatment, drugs were added simultaneously upon infection. Two days after  
512 infection, flow cytometry was performed to analyze GFP positive rate. The 50%  
513 inhibitory concentrations (IC50; compound concentration required to inhibit viral  
514 replication by 50% reduction of GFP positive cells) were determined using logarithmic  
515 interpolation using GraphPad Prism software version 7.0.

516 **Cell viability assay.** Caco-2-N cells were seeded into 96-well plate ( $1 \times 10^3$  cells/well).  
517 After 12 hours, cells were treated with drugs with different concentrations. Cell  
518 viability was measured two days post treatment with CellTiter-Glo Luminescent Cell  
519 Viability Assay kit (Promega, G7570) following standard protocol. In brief, cells in 100  
520  $\mu$ l culture medium were added with 100  $\mu$ l CellTiter-Glo reagent. After 15 minutes,  
521 luminescence was recorded with GloMax (Promega). CC<sub>50</sub> was determined using  
522 logarithmic interpolation using GraphPad Prism software version 7.0.

523 **Flow cytometry analysis.** Cells were detached in PBS containing 0.02% EDTA and

524 then washed once with cold PBS. Cells were then fixed in 4% PFA for 30 minutes at  
525 room temperature. Fixed cells were resuspended in PBS and analyzed by LSRFortessa  
526 SORP (BD Biosciences) and FlowJo software.

527 **Western blotting.** Sodium dodecyl sulfate-polyacrylamide gel electrophoresis (SDS-  
528 PAGE) immunoblotting was conducted as follows: After trypsinization and cell  
529 pelleting at 1500 r/m for 10 min, whole-cell lysates were harvested in cell lysis buffer  
530 (50 mM Tris-HCl [pH 7.5], 150mM NaCl, 1% NP-40, 1mM EDTA) supplemented with  
531 protease inhibitor cocktail (Sigma). Lysates were electrophoresed in 4-12%  
532 polyacrylamide gels and transferred onto PVDF membrane. The blots were blocked at  
533 room temperature for 0.5 h using 5% nonfat milk in 1× phosphate-buffered saline (PBS)  
534 containing 0.1% (v/v) Tween 20. The blots were exposed to primary antibodies anti-N  
535 (05-0154, AbMax), S (40589-T62, Sino Biological), β-Tubulin (CW0098, CWBIO),  
536 Flag (F7425, Sigma), ACE2 (10108-T24, Sino Biological) in 5% nonfat milk in 1×PBS  
537 containing 0.1% Tween 20 for 2 h. The blots were then washed in 1×PBS containing  
538 0.1% Tween 20. After 1h exposure to HRP-conjugated secondary antibodies and  
539 subsequent washes were performed as described for the primary antibodies.  
540 Membranes were visualized using the Luminescent image analyzer (GE).

541 **Antiviral screening.** Twelve hours prior to infection for the antiviral screening  $5 \times 10^4$   
542 Caco-2-N<sup>int</sup> cells were seeded in 96 well plates. The next day, a single dilution of each  
543 compound of the Topscience Natural Product Library at 5 μM final concentration was  
544 added to the cells (50 μL/well). DMSO or remdesivir (3.5μM) were included in each  
545 plate as the internal control. After 2 hours, 50 μL of virus was added to the wells at MOI  
546 0.05. Two days after infection, cells were collected for flow cytometry analysis to  
547 determine the GFP expression.

548 **Evaluation of antiviral activity using authentic SARS-CoV-2 virus.** A549 cells  
549 stably expressing human ACE2 were seeded in a 96-well plate ( $4 \times 10^4$  cells/well). Next  
550 day, cells were treated with drugs (Lycorine chloride (TargetMol, T2774), Tubeimoside  
551 I (TargetMol, T2715), Nigericin sodium (TargetMol, T3092), Monensin sodium  
552 (MedChemExpress, HY-N0150), Salinomycin (MedChemExpress, HY-15597)) of

553 different concentration for 2 hours prior to infection. Cells were infected with SARS-  
554 CoV-2 at an MOI of 1 for 1 h, washed three times with PBS, and incubated in 2% FBS  
555 culture medium for 24 h for viral antigen staining. Cells were fixed with 4%  
556 paraformaldehyde in PBS, permeablized with 0.2% Triton X-100, and incubated with  
557 the rabbit polyclonal antibody against SARS-CoV nucleocapsid protein (Rockland,  
558 200-401-A50, 1 $\mu$ g/ml) at 4 °C overnight. After three washes, cells were incubated with  
559 the secondary goat anti-rabbit antibody conjugated with Alexa Fluor 555 (Thermo  
560 #A32732, 2  $\mu$ g/ml) for 2 h at room temperature, followed by staining with 4',6-  
561 diamidino-2-phenylindole (DAPI). Images were collected using an Operetta High  
562 Content Imaging System (PerkinElmer). For high content imaging, two biological  
563 replicates for each concentration of drug were scanned and five representative fields  
564 were selected for each well of 96-well plates. Image analysis was performed using the  
565 PerkinElmer Harmony high-content analysis software 4.9. Cells were automatically  
566 identified by DAPI (nuclei). Mean fluorescent intensity of channel Alexa 555 (viral  
567 nucleocapsid) of each cell were subsequently calculated, respectively. For the 0%  
568 inhibition control, cells were infected in the presence of vehicle only. The IC<sub>50</sub> value  
569 was defined as the concentration at which there was a 50% decrease in N protein  
570 expression. Data were analyzed using GraphPad Prism 7.0. The IC<sub>50</sub> values were  
571 calculated by nonlinear regression analysis using the dose-response (variable slope)  
572 equation (four parameter logistic equation).

573 **Statistical analysis.** Student's *t* test or one-way analysis of variance (ANOVA) with  
574 Tukey's honestly significant difference (HSD) test was used to test for statistical  
575 significance of the differences between the different group parameters. *P* values of less  
576 than 0.05 were considered statistically significant.

577 **Data availability.** RNA-seq dataset generated here can be found in the aforementioned  
578 NCBI Gene Expression Omnibus (GEO Accession no. GSE162629,  
579 <https://www.ncbi.nlm.nih.gov/geo/query/acc.cgi?acc=GSE162629>). Other data from  
580 this study are available upon request from the corresponding author.

581

582

583 FIGURES AND FIGURE LEGENDS

584

Figure 1

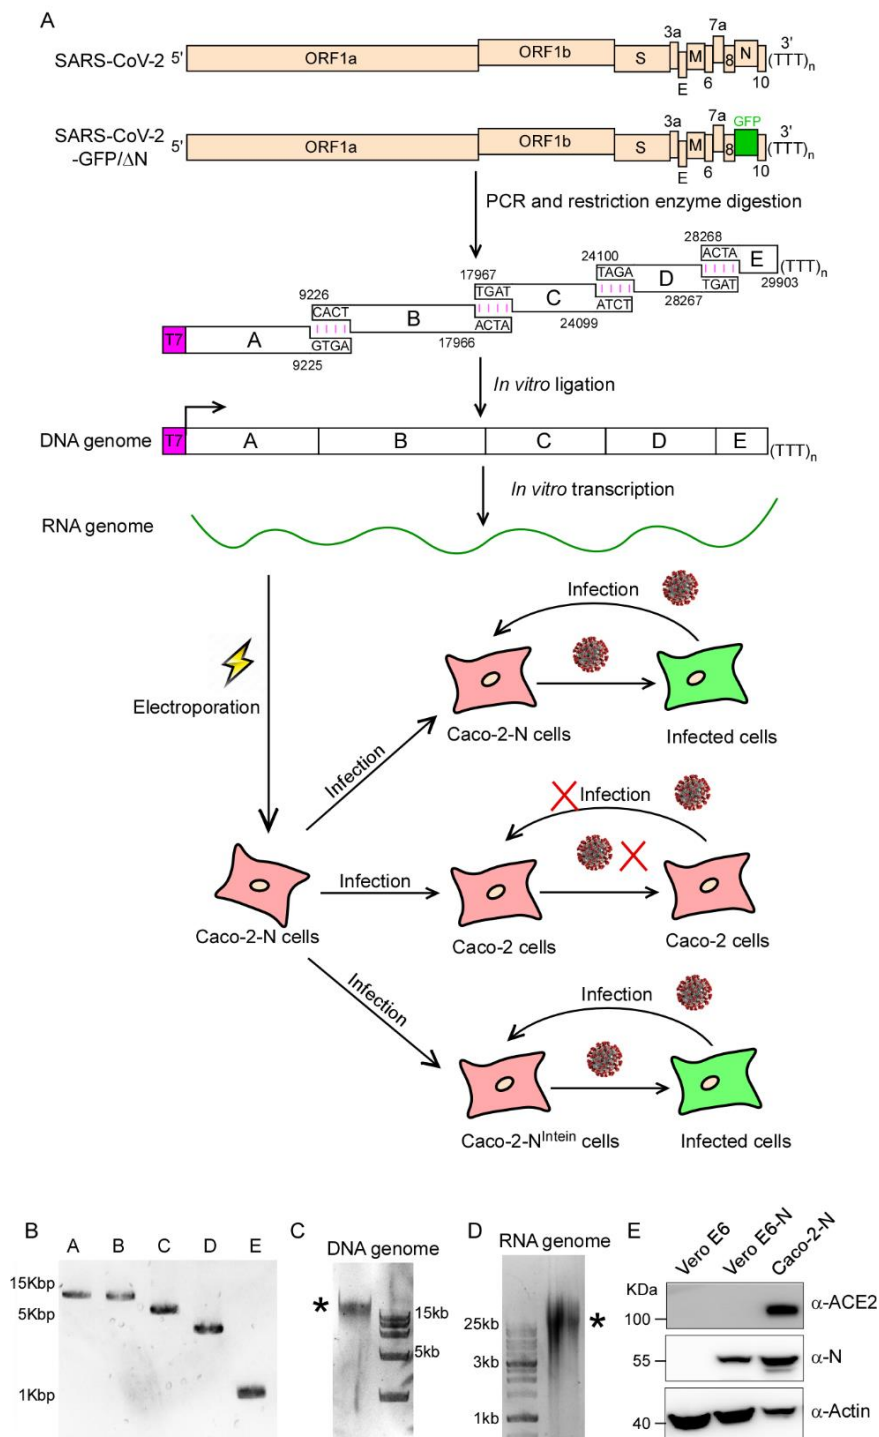

585 **Figure 1. Production of SARS-CoV-2 GFP/ $\Delta$ N trVLP.** (A) The top rows show  
586 genetic organizations of the SARS-CoV-2 and SARS-CoV-2 GFP/ $\Delta$ N genomes. The  
587 ORF of N is replaced with reporter gene (GFP here). The cDNA of SARS-CoV-2  
588 GFP/ $\Delta$ N genome was divided into five fragments designated as Fragment A, B, C, D  
589 and E, which could be obtained by PCR (B). Each cDNA fragment was flanked by a  
590 class IIS restriction endonuclease site (BsaI or BsmBI) and the nucleotide sequences  
591 and locations of the cohesive overhangs are indicated. The fragment cDNA were  
592 digested and purified for directed assembly of SARS-CoV-2 GFP/ $\Delta$ N cDNA (see C  
593 panel, and the star indicates the genome-length cDNA), which served as the template  
594 for *in vitro* transcription to generate viral RNA genome (see D panel, and the star  
595 indicates the genome-length RNA transcript). The viral genomic RNAs were  
596 electroporated into Caco-2-N cells. After 3 days, the supernatant was collected and  
597 inoculated with Caco-2 or Caco-2-N cells. (E). Western blotting assay was performed  
598 to detect the expression of N proteins and ACE2 in Caco-2-N cells, Vero E6 and Vero  
599 E6-N cells.

600  
601



602

Figure 2

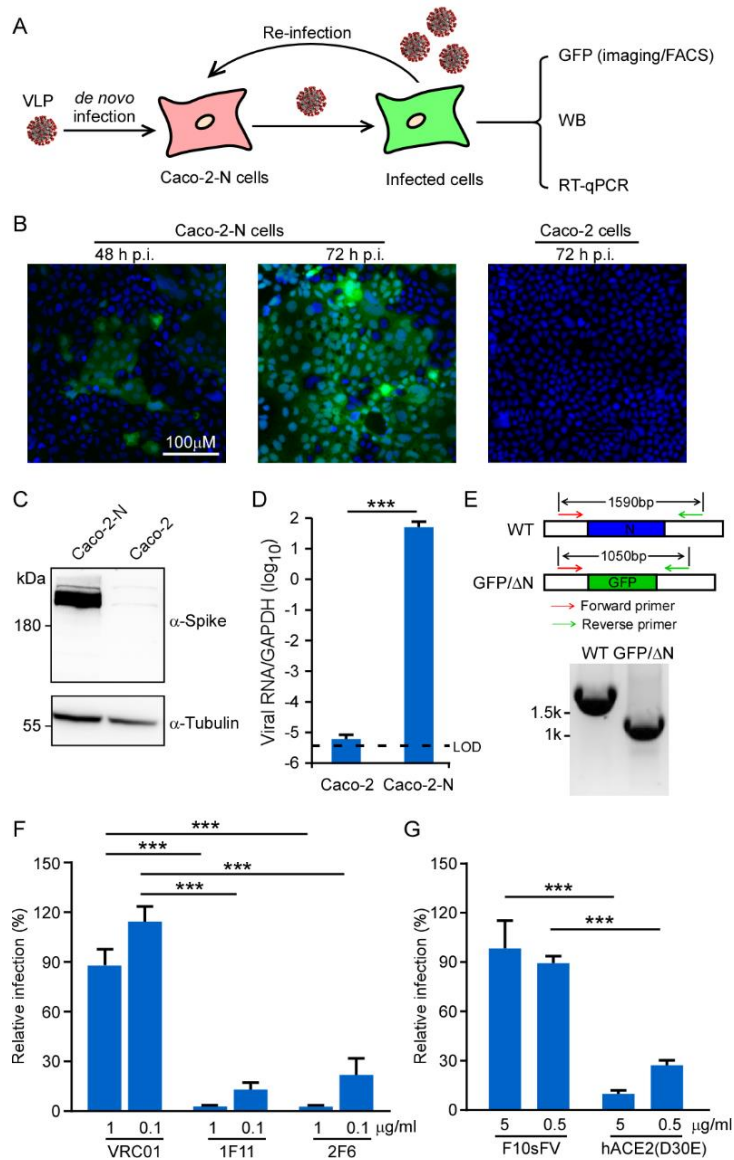

603

604 **Figure 2. The recombinant SARS-CoV-2 GFP/ΔN trVLP can propagate with the**  
 605 **help of viral N protein.** (A) Experimental scheme. Caco-2 or Caco-2-N cells were  
 606 infected with SARS-CoV-2 GFP/ΔN for 3h (MOI 0.05), washed, and incubated for an  
 607 additional 72 h. GFP fluorescence were observed or quantified by microscopy or flow  
 608 cytometry analysis. Viral RNA was determined by RT-qPCR assay; (B) GFP  
 609 expression was observed in Caco-2 or Caco-2-N cells using microscopy at indicated  
 610 time point after inoculation; Representative images from one of three independent

611 experiments. (C) Cell lysates were resolved by SDS-PAGE and probed with anti-  
612 Spike and anti-Tubulin antibodies. Representative images from two independent  
613 experiments; (D) The total RNAs were extracted and RT-qPCR assays were  
614 conducted to determine viral RNA levels. Error bars represent the standard deviations  
615 from one of two independent experiments performed in triplicate; (E) RT-PCR  
616 analysis of the SARS-CoV-2 GFP/ $\Delta$ N genome in Caco-2-N cells infected with  
617 recombinant virus using a primer set flanking the N region. The expected DNA sized  
618 were indicated in each genome, and DNA marker is shown on the left. Representative  
619 images from one of two independent experiments; (F-G) Recombinant SARS-CoV-2  
620 GFP/ $\Delta$ N virus was incubated with indicated doses of neutralizing mAbs against  
621 SARS-CoV-2 (1F11 and 2F6) or HIV (VCR01), as well as soluble human ACE2-Fc or  
622 F10sFV for 1 h prior to inoculation. The infection was analyzed by GFP expression 2  
623 days later, and the number of positive cells was expressed as a percentage of that for  
624 the VRC01 or F10sFV treatment control. Error bars represent the standard deviations  
625 from three independent experiments (n=6). \*\*\*,  $P < 0.001$ . Significance assessed by  
626 one-way ANOVA.

627

628

629

Figure 3

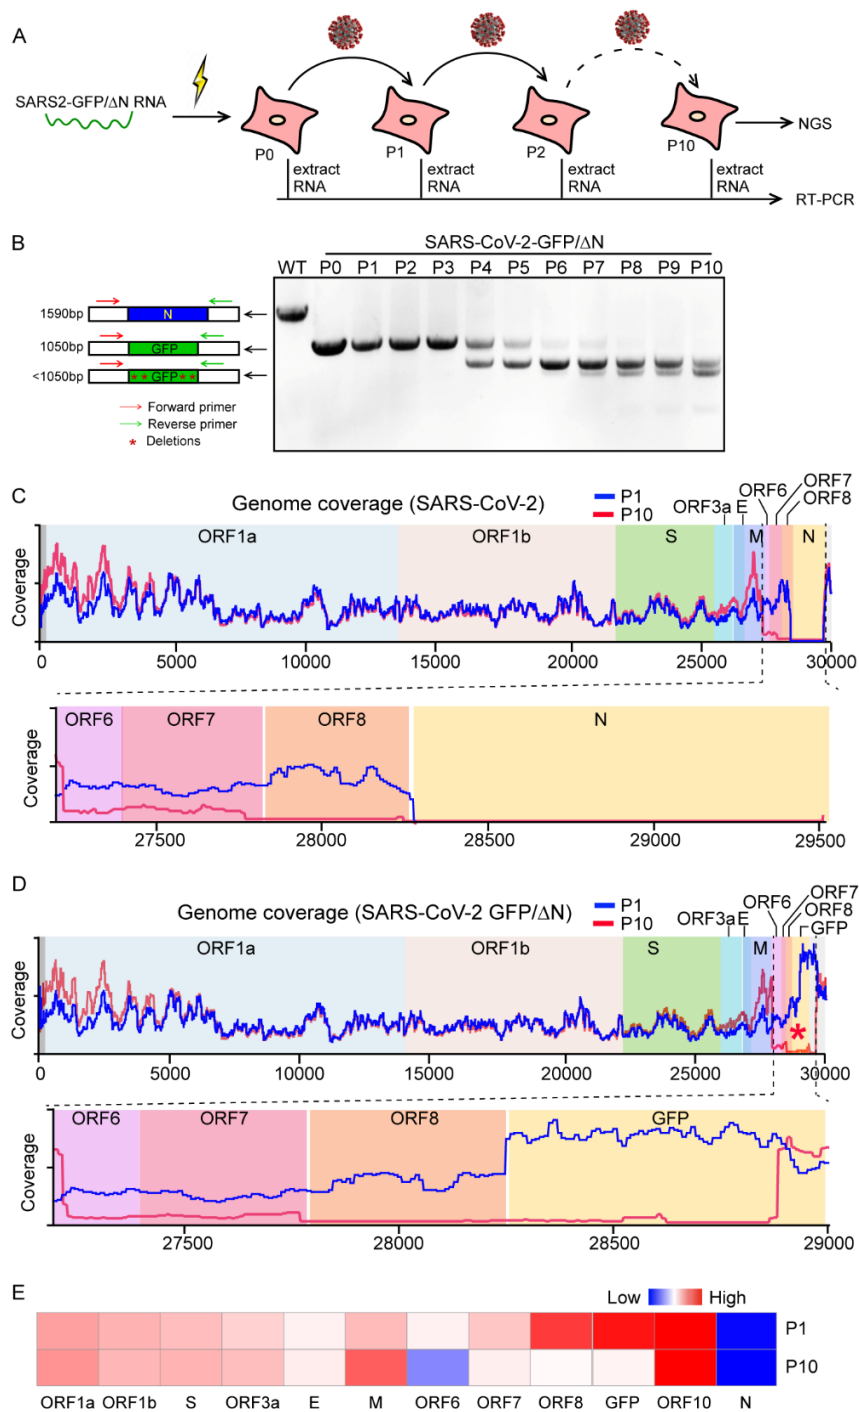

630 **Figure 3. Characterization of the genetic stability of SARS-CoV-2 GFP/ΔN trVLP.**  
 631 (A) Detection of the GFP reporter gene during viral passage. RNAs were extracted from  
 632 the VLP infected cells of P0 to P10 passage, respectively. (B) RT-PCR was performed

633 with a primer pair flanking the N region of ORF8 and 3'UTR. The PCR products were  
634 resolved on an agarose gel using electrophoresis. The numbers of time points-samples-  
635 passage were denoted on the top of each lane. Representative images from one of three  
636 independent experiments; (C-D) RNA-seq coverage of viruse derived reads aligned to  
637 SARS-CoV-2 (C) or SARS-CoV-2 GFP/ $\Delta$ N (D) genome, respectively. (E) Heatmap  
638 shows the expression levels of each subgenomic RNA of P1 or P10 trVLP.

639

640

641

Figure 4

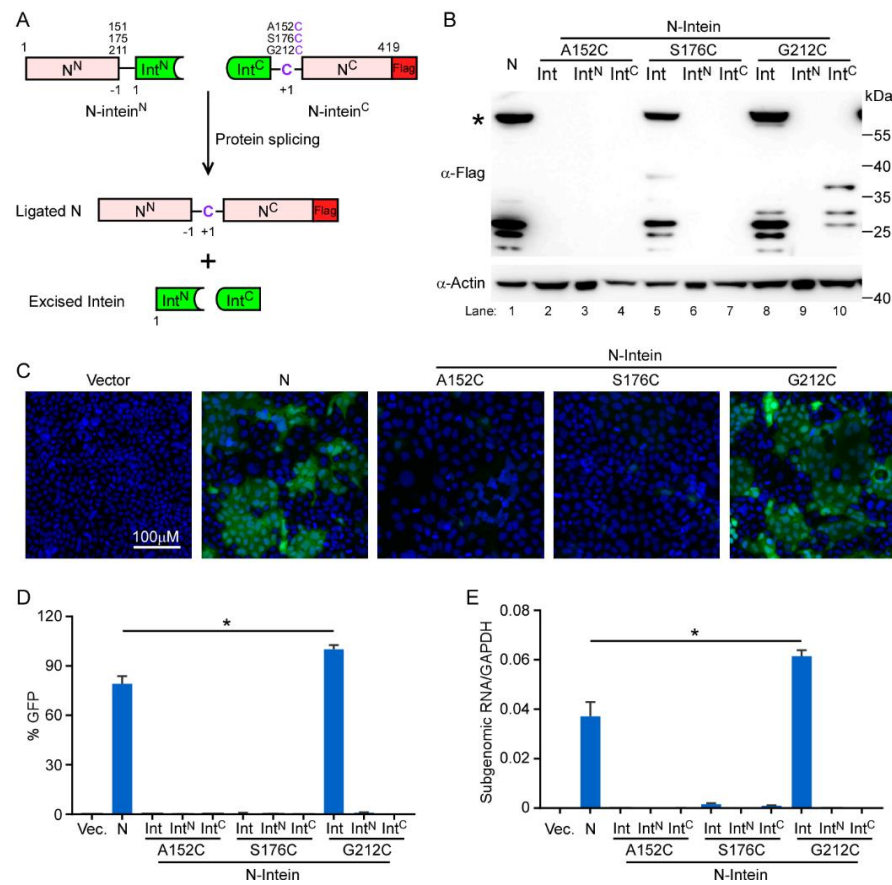

642 **Figure 4. Reconstitution of functional N protein by intein-mediated protein**  
 643 **splicing.** (A) Scheme depicting of intein-mediated protein trans-splicing to reconstitute  
 644 full length N protein. (B) Western blot (WB) analysis of lysates from Caco-2 cells  
 645 transduced with either full-length N or intein-N lentiviruses. The star indicates the full-  
 646 length N protein. The WB is representative of three independent experiments. (C) GFP  
 647 fluorescence in Caco-2-N cells infected cell culture medium (containing SARS-CoV-2  
 648 GFP/ΔN progeny) collected from each Caco-2-N<sup>int</sup> cells which was inoculated with  
 649 SARS-CoV-2 GFP/ΔN trVLP at 2 days of culture. The image is representative of n=4.  
 650 (D) Cells were harvested to quantify GFP expression by flow cytometry analysis, and  
 651 (E) Subgenomic RNA of E were determined by RT-qPCR assay. Error bars represent  
 652 the standard deviations from one of three independent experiments performed in  
 653 triplicate. \*, P < 0.05. Significance assessed by one-way ANOVA.

654

655

Figure 5

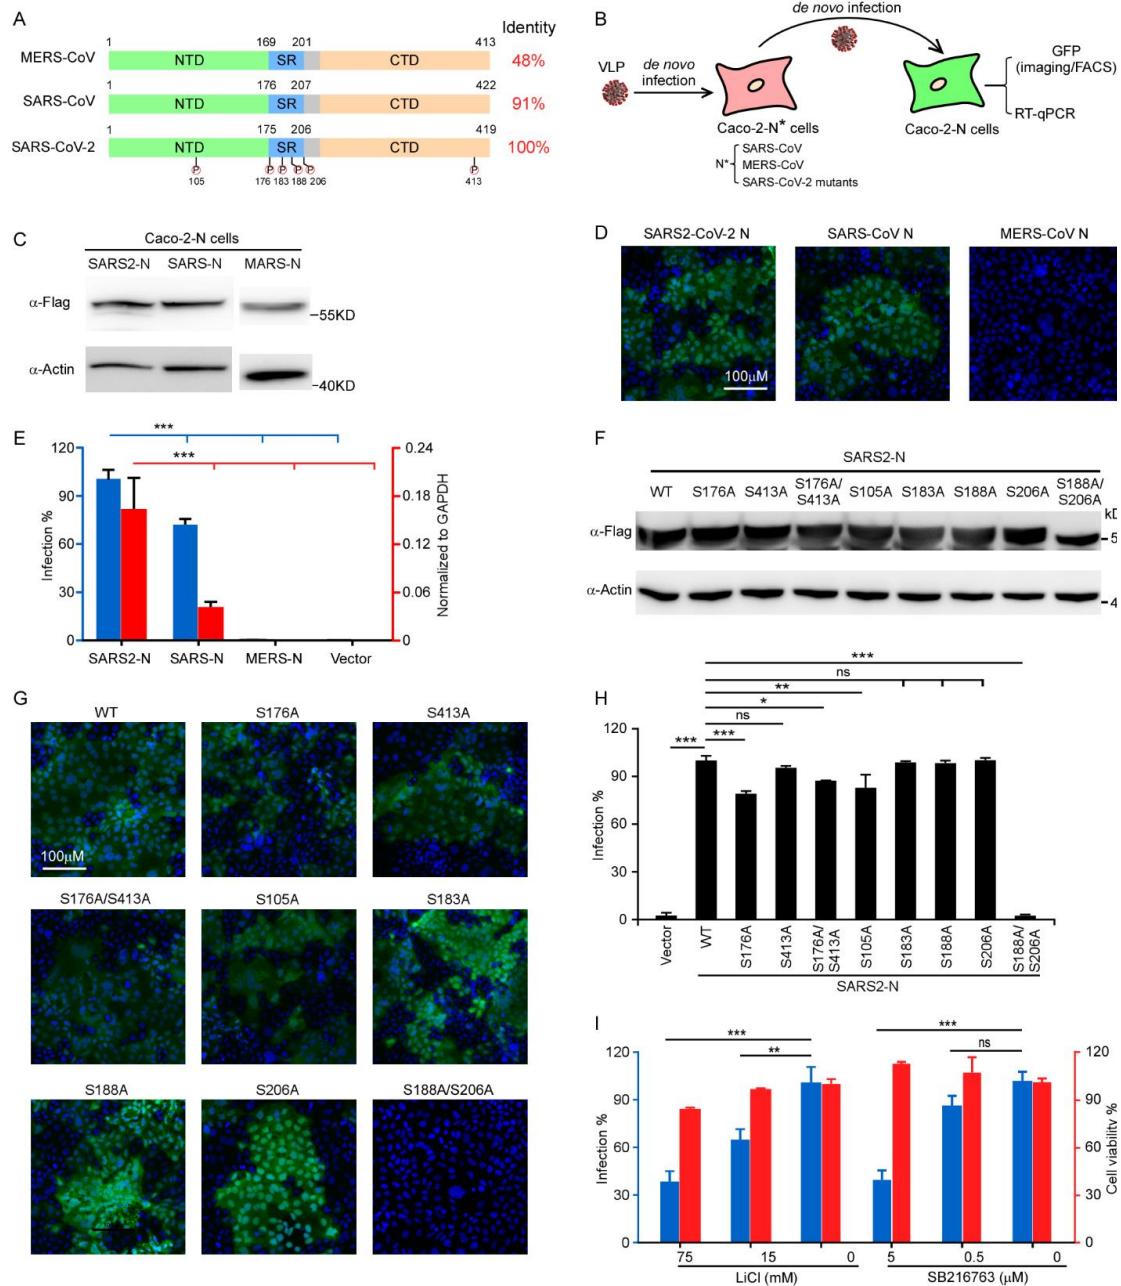

656 **Figure 5. Site-specific phosphorylation of N is required to support virus life cycle.**

657 (A) Schematics and alignments of N proteins from MERS-CoV, SARS-CoV and SARS-

658 CoV-2. The phosphorylation sites in SARS-CoV-2 N protein were highlighted. (B)

659 Schematic presentation of assessment of N variants function. The trVLP inoculated

660 with Caco-2 cells transduced with N variants, and the cell culture medium were

661 collected to infect the Caco-2-N cells, and GFP expression analyzed by flow  
662 cytometry/microscopy or viral subgenomic RNA abundance were determined by RT-  
663 qPCR. (C) Western blotting assay was performed to detect the N proteins expression in  
664 Caco-2 cells transduced with distinct N genes from SARS-CoV-2, SARS-CoV or  
665 MERS-CoV. (D-E) The cell culture medium was collected from SARS-CoV-2 GFP/ $\Delta$ N  
666 trVLP infected Caco-2 cells expressing N from SARS-CoV-2, SARS-CoV or MERS-  
667 CoV to infect the naïve Caco-2-N cells. GFP were observed using microscopy and  
668 cellular RNA was extracted for RT-qPCR analysis to determine viral subgenomic RNA  
669 levels. (F) Western blotting assay detected the expression of SARS-CoV-2 N WT or  
670 mutants in Caco-2 cells. (G-H) The cell culture medium was collected from SARS-  
671 CoV-2 GFP/ $\Delta$ N trVLP infected Caco-2 cells expressing SARS-CoV-2 N mutants to  
672 infect the naïve Caco-2-N cells. GFP were observed using microscopy and cellular  
673 RNA was extracted for RT-qPCR analysis to determine viral subgenomic RNA levels.  
674 (I) GSK-3 inhibitors LiCl or SB216763 treated Caco-2-N cells inoculated with SARS-  
675 CoV-2 GFP/ $\Delta$ N trVLP, the cell culture medium was then inoculated with Caco-2-N  
676 cells. RNA was extracted for RT-qPCR analysis to determine viral subgenomic RNA  
677 levels. Cell viability was evaluated by CellTiter-Glo assay. Error bars (E, H and I)  
678 represent the standard deviations from one of three independent experiments performed  
679 in triplicate. n.s. no significance; \*,  $P < 0.05$ ; \*\*,  $P < 0.01$ ; \*\*\*,  $P < 0.001$ . Significance  
680 assessed by one-way ANOVA.

681

682

683

Figure 6

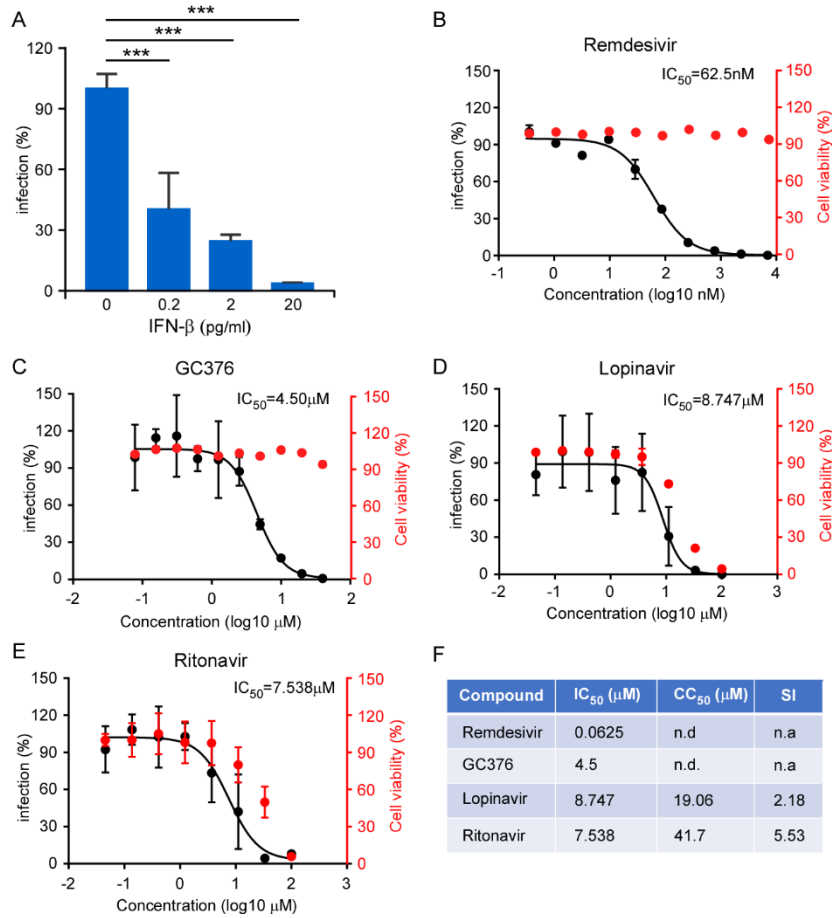

684 **Figure 6. Inhibition of recombinant SARS-CoV-2 GFP/ΔN trVLP infection by IFN**  
 685 **and antivirals.** (A) IFN-β pretreated Caco-2-N<sup>int</sup> cells were subsequently infected with  
 686 trVLP and cells were subjected to flow cytometry analysis for quantify the GFP  
 687 fluorescence at 2 days post-infection. Error bars represent the standard deviations from  
 688 three independent experiments (n=6). (B-E) Antiviral effect of remdesivir, GC376,  
 689 lopinavir and ritonavir. The drug treated cells were infected with trVLP and GFP  
 690 fluorescence was quantified at 48h after infection. The cytotoxic effect of each drug at  
 691 indicated concentrations were determined by CellTiter-Glo cell viability assay. The  
 692 virus infection or cytotoxicity is plotted versus compound concentration (n=3 biological  
 693 replicates for all compounds). The black dots indicate replicate measurements, and the



694 black lines indicate dose-response curve fits. The red dots indicate cytotoxicity.  $IC_{50}$   
695 values were calculated using Prism software and is representative of one of three  
696 independent experiments performed in triplicate. Three independent experiments had  
697 similar results. (F) Comparison of antiviral activity and cytotoxicity of each compound.  
698 Selectivity Index (SI), a ratio that compares a drug's cytotoxicity and antiviral activity  
699 was also calculated. n.d.=not detected; n.a.=not applicable.

700

701

702

Figure 7

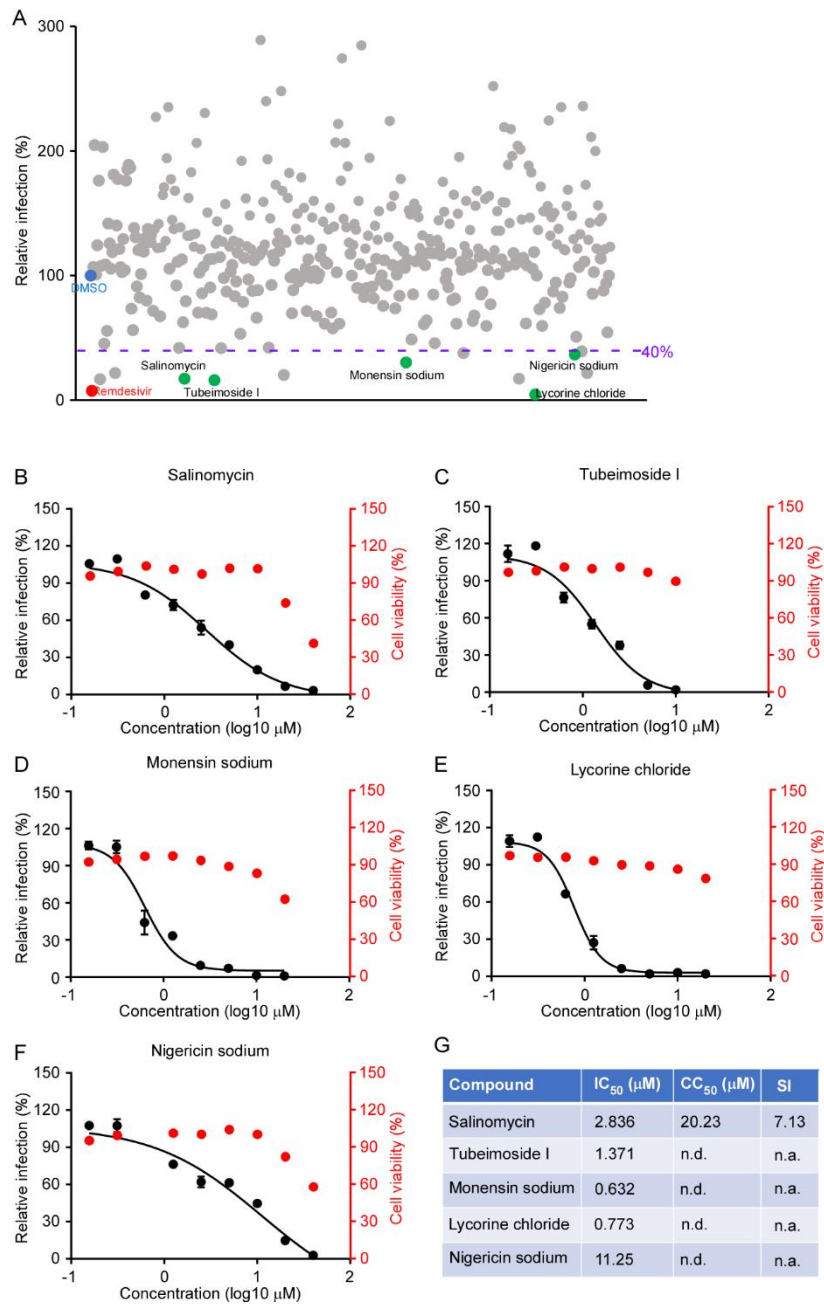

703

704 **Figure 7. High throughput screening of antivirals against SARS-CoV-2 infection**

705 **using trVLP system.** (A) Screening of 377 compounds from Topscience Natural

706 Product Library and hits selection. The purple dot line represents the threshold (40%)

707 for positive hit compounds. DMSO (blue) and remdesivir (red) are used as the control

708 for the screening. Each dot represents a single compound, and the green dots represent  
709 the promising candidates which exhibited potent antiviral activity without dramatic  
710 cytotoxic effect. (B-F) Dose response curves of selected hit compounds. Compounds  
711 concentrations are presented in log scale for logarithmic interpolation. Dose response  
712 curves were generated using GraphPad Prism software version 7.0.  $IC_{50}$  values were  
713 calculated using Prism software and is representative of one of three independent  
714 experiments. Error bars represent the standard deviations from one of three independent  
715 experiments performed in triplicate. (G) Comparison of antiviral activity and  
716 cytotoxicity of each compound. Selectivity Index (SI), a ratio that compares a drug's  
717 cytotoxicity and antiviral activity was also calculated. n.d.=not detected; n.a.=not  
718 applicable.

719

720

721 **SUPPLEMENTAL FIGURES AND FIGURE LEGENDS**

722

Fig S1

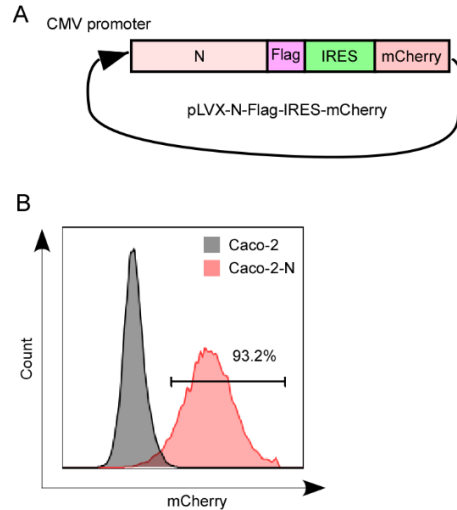

723 **Supplemental Figure 1. Generation of Caco-2 cell expressing SARS-CoV-2 N by**  
724 **lentiviral transduction.** (A) Scheme depicting the bicistronic lentiviral constructs for  
725 expressing SARS-CoV-2 N protein with C-terminal Flag tag. (B) Representative flow  
726 cytometry plots demonstrating efficient lentivirus transduction. Caco-2 cells were  
727 transduced with pLVX-N-Flag-IRES-mCherry or not transduced. Flow cytometric  
728 analysis was performed 4 d following transduction to quantify the frequencies of N-  
729 expressing cells. The flow cytometry result was representative of one of three  
730 independent experiments.

731

732

733

Fig S2

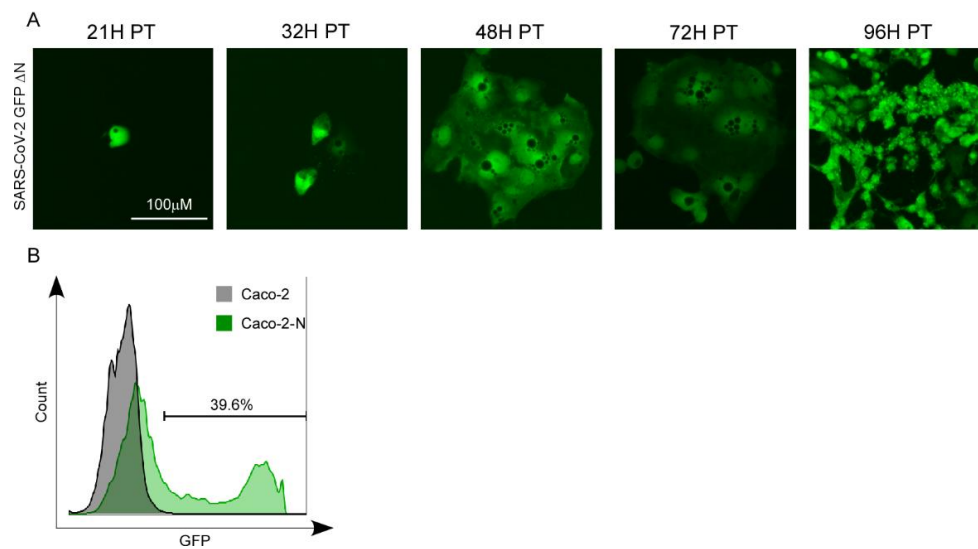

734 **Supplemental Figure 2. GFP expression in Caco-2-N cells electroporated with**  
735 **SARS-CoV-2 GFP/ $\Delta$ N RNA.** (A) GFP expression in Caco-2-N cells electroporated  
736 with SARS-CoV-2 GFP/ $\Delta$ N RNA. Caco-2-N cells were electroporated with 20  $\mu$ g of  
737 SARS-CoV-2 GFP/ $\Delta$ N RNA. From 21h-96h p.t., GFP expression in the cells was  
738 observed with microscopy. (B) GFP expression was quantified by flowcytometry at 96h  
739 post transfection of the RNA. This experiment was representative of three independent  
740 experiments.

741

742

743

Fig S3

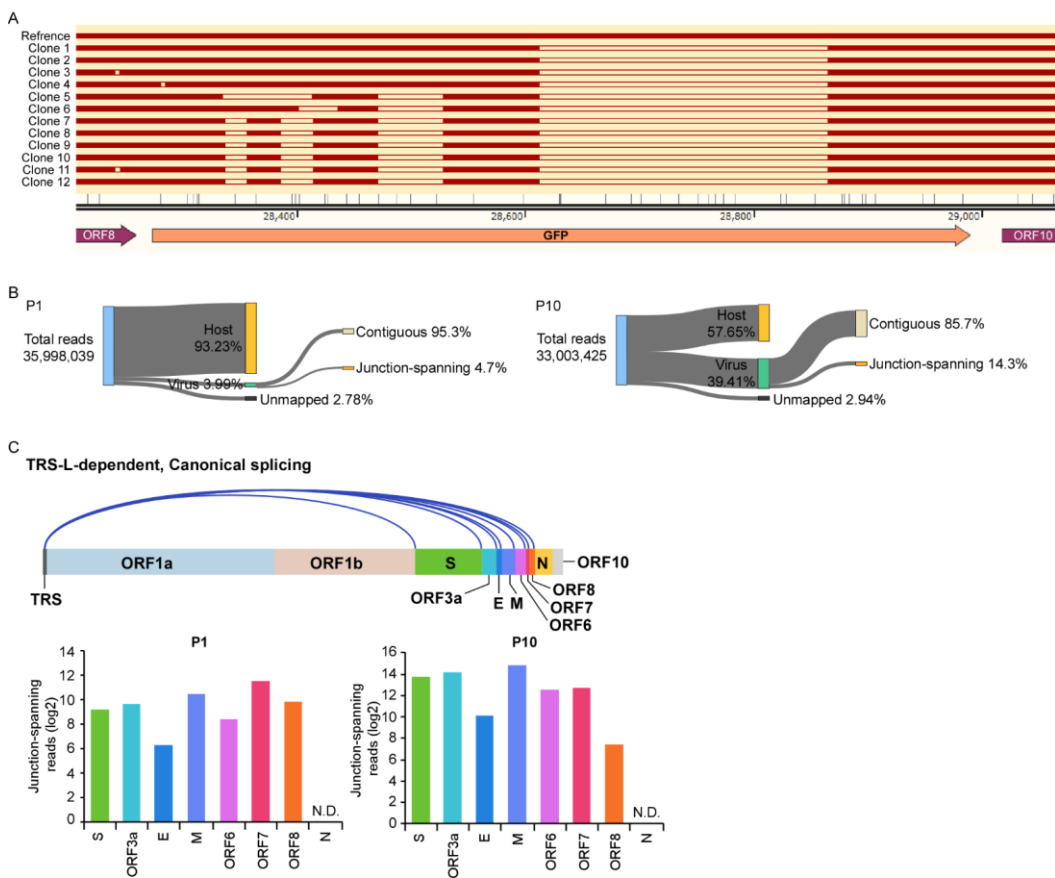

744 **Supplemental Figure 3. Characterization of the genetic stability of SARS-CoV-2**  
 745 **GFP/ΔN virus.** (A) RT-PCR products from P10 virus infected cell passage were cloned  
 746 into pEASY-Blunt vector, and 12 colonies were randomly chosen for DNA sequences  
 747 analysis. Multiple deletions were detected in the amplicon. (B) Categories of mapped  
 748 reads from P1 and P10 virus infected Caco-2-N cells. (C) Canonical discontinuous  
 749 transcription (top) that is mediated by TRS-L (TRS in the leader) and TRS-B (TRS in  
 750 the body). Quantification of junction-reads from canonical discontinuous transcripts  
 751 post P1 and P10 virus infection.

752

753

754

Fig S4

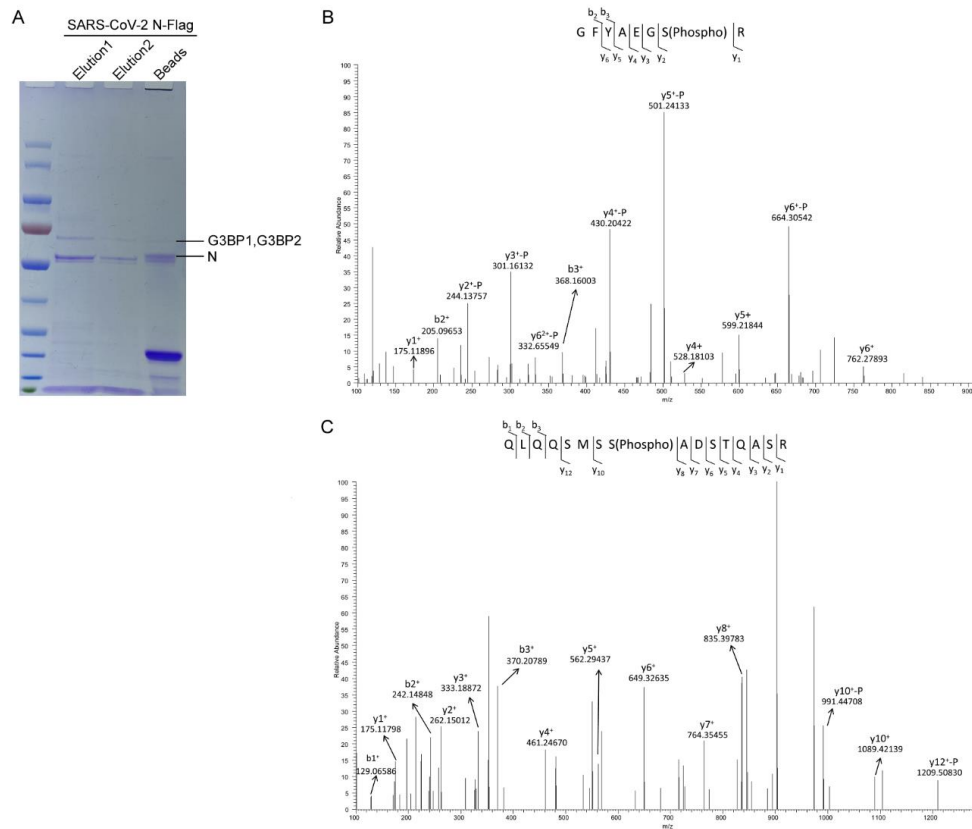

755 **Supplemental Figure 4. Identification of host factors associated with N protein and**  
 756 **phosphorylation on N protein by mass spectrometry.** (A) Flag tagged N protein was  
 757 immunoprecipitated from Caco-2-N cells infected with recombinant SARS-CoV-2  
 758 GFP/ $\Delta$ N trVLP using Flag antibody, and the proteins were analyzed on SDS-PAGE gel.  
 759 The proteins were visualized by Coomassie blue staining. N, G3BP1 and G3BP2 were  
 760 labelled. (B) Phosphorylated peptides of N protein derived from Caco-2-N cells. Caco-  
 761 2-N cells in which N was C-terminal Flag-tagged were collected and cell lysates were  
 762 immunoprecipitated with anti-Flag coupled beads. Phosphorylated peptides of the  
 763 immunoprecipitates were analyzed by mass spectrometry.

764

765

766 **REFERENCES**

767

- 768 1 Wang, C., Horby, P. W., Hayden, F. G. & Gao, G. F. A novel coronavirus outbreak of global  
769 health concern. *Lancet* **395**, 470-473, doi:10.1016/S0140-6736(20)30185-9 (2020).
- 770 2 Rome, B. N. & Avorn, J. Drug Evaluation during the Covid-19 Pandemic. *N Engl J Med*  
771 **382**, 2282-2284, doi:10.1056/NEJMp2009457 (2020).
- 772 3 Fung, T. S. & Liu, D. X. Human Coronavirus: Host-Pathogen Interaction. *Annu Rev*  
773 *Microbiol* **73**, 529-557, doi:10.1146/annurev-micro-020518-115759 (2019).
- 774 4 Enjuanes, L., Almazan, F., Sola, I. & Zuniga, S. Biochemical aspects of coronavirus  
775 replication and virus-host interaction. *Annu Rev Microbiol* **60**, 211-230,  
776 doi:10.1146/annurev.micro.60.080805.142157 (2006).
- 777 5 Lai, M. M. Coronavirus: organization, replication and expression of genome. *Annu Rev*  
778 *Microbiol* **44**, 303-333, doi:10.1146/annurev.mi.44.100190.001511 (1990).
- 779 6 Li, F. Structure, Function, and Evolution of Coronavirus Spike Proteins. *Annu Rev Virol* **3**,  
780 237-261, doi:10.1146/annurev-virology-110615-042301 (2016).
- 781 7 Zuniga, S. *et al.* Coronavirus nucleocapsid protein facilitates template switching and is  
782 required for efficient transcription. *J Virol* **84**, 2169-2175, doi:10.1128/JVI.02011-09 (2010).
- 783 8 Cruz, J. L. *et al.* Coronavirus gene 7 counteracts host defenses and modulates virus  
784 virulence. *PLoS Pathog* **7**, e1002090, doi:10.1371/journal.ppat.1002090 (2011).
- 785 9 Liu, D. X., Fung, T. S., Chong, K. K., Shukla, A. & Hilgenfeld, R. Accessory proteins of SARS-  
786 CoV and other coronaviruses. *Antiviral Res* **109**, 97-109,  
787 doi:10.1016/j.antiviral.2014.06.013 (2014).
- 788 10 Almazan, F. *et al.* Coronavirus reverse genetic systems: infectious clones and replicons.  
789 *Virus Res* **189**, 262-270, doi:10.1016/j.virusres.2014.05.026 (2014).
- 790 11 Xie, X. *et al.* An Infectious cDNA Clone of SARS-CoV-2. *Cell Host Microbe* **27**, 841-848  
791 e843, doi:10.1016/j.chom.2020.04.004 (2020).
- 792 12 Hou, Y. J. *et al.* SARS-CoV-2 Reverse Genetics Reveals a Variable Infection Gradient in the  
793 Respiratory Tract. *Cell* **182**, 429-446 e414, doi:10.1016/j.cell.2020.05.042 (2020).
- 794 13 Ju, B. *et al.* Human neutralizing antibodies elicited by SARS-CoV-2 infection. *Nature* **584**,  
795 115-119, doi:10.1038/s41586-020-2380-z (2020).
- 796 14 Zhou, T. *et al.* Structural basis for broad and potent neutralization of HIV-1 by antibody  
797 VRC01. *Science* **329**, 811-817, doi:10.1126/science.1192819 (2010).
- 798 15 Chan, K. K. *et al.* Engineering human ACE2 to optimize binding to the spike protein of  
799 SARS coronavirus 2. *Science* **369**, 1261-1265, doi:10.1126/science.abc0870 (2020).
- 800 16 Li, Y. *et al.* Potential host range of multiple SARS-like coronaviruses and an improved  
801 ACE2-Fc variant that is potent against both SARS-CoV-2 and SARS-CoV-1.  
802 doi:10.1101/2020.04.10.032342 (2020).
- 803 17 Quéromès, G. *et al.* Characterization of SARS-CoV-2 ORF6 deletion variants detected in  
804 a nosocomial cluster during routine genomic surveillance, Lyon, France. *bioRxiv* (2020).
- 805 18 Addetia, A. *et al.* Identification of multiple large deletions in ORF7a resulting in in-frame  
806 gene fusions in clinical SARS-CoV-2 isolates. *J Clin Virol* **129**, 104523,  
807 doi:10.1016/j.jcv.2020.104523 (2020).
- 808 19 Riojas, M. A. *et al.* A Rare Deletion in SARS-CoV-2 ORF6 Dramatically Alters the Predicted



- 809 Three-Dimensional Structure of the Resultant Protein. *bioRxiv*,  
810 doi:10.1101/2020.06.09.134460 (2020).
- 811 20 Su, Y. C. F. *et al.* Discovery and Genomic Characterization of a 382-Nucleotide Deletion in  
812 ORF7b and ORF8 during the Early Evolution of SARS-CoV-2. *mBio* **11**,  
813 doi:10.1128/mBio.01610-20 (2020).
- 814 21 Muir, T. W. Semisynthesis of proteins by expressed protein ligation. *Annu Rev Biochem*  
815 **72**, 249-289, doi:10.1146/annurev.biochem.72.121801.161900 (2003).
- 816 22 Zettler, J., Schutz, V. & Mootz, H. D. The naturally split Npu DnaE intein exhibits an  
817 extraordinarily high rate in the protein trans-splicing reaction. *FEBS Lett* **583**, 909-914,  
818 doi:10.1016/j.febslet.2009.02.003 (2009).
- 819 23 Wu, C. H. *et al.* Glycogen synthase kinase-3 regulates the phosphorylation of severe acute  
820 respiratory syndrome coronavirus nucleocapsid protein and viral replication. *J Biol Chem*  
821 **284**, 5229-5239, doi:10.1074/jbc.M805747200 (2009).
- 822 24 Wu, C. H., Chen, P. J. & Yeh, S. H. Nucleocapsid phosphorylation and RNA helicase DDX1  
823 recruitment enables coronavirus transition from discontinuous to continuous transcription.  
824 *Cell Host Microbe* **16**, 462-472, doi:10.1016/j.chom.2014.09.009 (2014).
- 825 25 Lokugamage, K. G. *et al.* Type I interferon susceptibility distinguishes SARS-CoV-2 from  
826 SARS-CoV. *J Virol*, doi:10.1128/JVI.01410-20 (2020).
- 827 26 Vanderheiden, A. *et al.* Type I and Type III Interferons Restrict SARS-CoV-2 Infection of  
828 Human Airway Epithelial Cultures. *J Virol* **94**, doi:10.1128/JVI.00985-20 (2020).
- 829 27 Park, A. & Iwasaki, A. Type I and Type III Interferons - Induction, Signaling, Evasion, and  
830 Application to Combat COVID-19. *Cell Host Microbe* **27**, 870-878,  
831 doi:10.1016/j.chom.2020.05.008 (2020).
- 832 28 Wang, M. *et al.* Remdesivir and chloroquine effectively inhibit the recently emerged novel  
833 coronavirus (2019-nCoV) in vitro. *Cell Res* **30**, 269-271, doi:10.1038/s41422-020-0282-0  
834 (2020).
- 835 29 Pruijssers, A. J. *et al.* Remdesivir Inhibits SARS-CoV-2 in Human Lung Cells and Chimeric  
836 SARS-CoV Expressing the SARS-CoV-2 RNA Polymerase in Mice. *Cell Rep* **32**, 107940,  
837 doi:10.1016/j.celrep.2020.107940 (2020).
- 838 30 Siegel, D. *et al.* Discovery and Synthesis of a Phosphoramidate Prodrug of a Pyrrolo[2,1-  
839 f][triazin-4-amino] Adenine C-Nucleoside (GS-5734) for the Treatment of Ebola and  
840 Emerging Viruses. *J Med Chem* **60**, 1648-1661, doi:10.1021/acs.jmedchem.6b01594  
841 (2017).
- 842 31 Sheahan, T. P. *et al.* Broad-spectrum antiviral GS-5734 inhibits both epidemic and  
843 zoonotic coronaviruses. *Sci Transl Med* **9**, doi:10.1126/scitranslmed.aal3653 (2017).
- 844 32 Warren, T. K. *et al.* Therapeutic efficacy of the small molecule GS-5734 against Ebola virus  
845 in rhesus monkeys. *Nature* **531**, 381-385, doi:10.1038/nature17180 (2016).
- 846 33 Flexner, C. HIV-protease inhibitors. *N Engl J Med* **338**, 1281-1292,  
847 doi:10.1056/NEJM199804303381808 (1998).
- 848 34 Cao, B. *et al.* A Trial of Lopinavir-Ritonavir in Adults Hospitalized with Severe Covid-19. *N*  
849 *Engl J Med* **382**, 1787-1799, doi:10.1056/NEJMoa2001282 (2020).
- 850 35 Shen, L. *et al.* High-Throughput Screening and Identification of Potent Broad-Spectrum  
851 Inhibitors of Coronaviruses. *J Virol* **93**, doi:10.1128/JVI.00023-19 (2019).
- 852 36 Alonso-Caplen, F. V., Matsuoka, Y., Wilcox, G. E. & Compans, R. W. Replication and

- 853 morphogenesis of avian coronavirus in Vero cells and their inhibition by monensin. *Virus*  
854 *Res* **1**, 153-167, doi:10.1016/0168-1702(84)90070-4 (1984).
- 855 37 lanevski, A. *et al.* Potential Antiviral Options against SARS-CoV-2 Infection. *Viruses* **12**,  
856 doi:10.3390/v12060642 (2020).
- 857 38 Morens, D. M. & Fauci, A. S. Emerging Pandemic Diseases: How We Got to COVID-19.  
858 *Cell* **182**, 1077-1092, doi:10.1016/j.cell.2020.08.021 (2020).
- 859 39 Gordon, D. E. *et al.* A SARS-CoV-2 protein interaction map reveals targets for drug  
860 repurposing. *Nature* **583**, 459-468, doi:10.1038/s41586-020-2286-9 (2020).
- 861 40 Savastano, A., Ibáñez de Opakua, A., Rankovic, M. & Zweckstetter, M. Nucleocapsid  
862 protein of SARS-CoV-2 phase separates into RNA-rich polymerase-containing  
863 condensates. *Nature Communications* **11**, 6041, doi:10.1038/s41467-020-19843-1  
864 (2020).
- 865 41 Cascarina, S. M. & Ross, E. D. A proposed role for the SARS-CoV-2 nucleocapsid protein  
866 in the formation and regulation of biomolecular condensates. *FASEB J* **34**, 9832-9842,  
867 doi:10.1096/fj.202001351 (2020).
- 868 42 Ju, X. *et al.* Identification of functional cis-acting RNA elements in the hepatitis E virus  
869 genome required for viral replication. *PLoS Pathog* **16**, e1008488,  
870 doi:10.1371/journal.ppat.1008488 (2020).

871
